# Supplementary material for: Angina and Future Cardiovascular Events in Stable Patients With Coronary Artery Disease: Insights From the Reduction of Atherothrombosis for Continued Health (REACH) Registry
Source: PubMed Central journal article supplement — J Am Heart Assoc. 2016 Sep 28;5(10):e004080. doi: 10.1161/JAHA.116.004080 (PMC5121505; doi:10.1161/jaha.116.004080), 2016-09-28
Supplement: JAH3-5-e004080-s001.pdf [file JAH3-5-e004080-s001.pdf]

# **SUPPLEMENTAL MATERIAL**

## REACH Registry Investigators:

**Australia:** Heidi Andersen-Dalheim, Paul Anderson, Bill Anell, Sam Arber, Kathleen Armstrong, Dean Arnot, Alan Baldam, Ian Barratt, Sebastian Barresi, Jeff Beder, Michael Benson, Frederick Bergman, James Best, Rajesh Bhasim, Geoff Bovell, Neil Bowman, Mal Brkic, David Bromberger, David Brown, Jean Brown, Michael Brownstein, Angela Bruce, John Buonopane, Steven Burns, Alexis Butler, Danny Byrne, Judith Carson, Peter Cassimatis, Greig Chaffey, Dianne Chambers, Wing-Jung Chan, Ben Chan, James Cheatham, Rachel Chen, Brian Cheong, Christina Cheung, John Chin, Anthony Chiu, Eric Choo, Andrew Chow, Anna Marie Chow, Dara Chung, Michael Conos, Nicholas Cooke, Simon Cooper, Peter Coulton, Mariam Cranswick, Garth Crichton, Adrian Dabscheck, Jonathan Dalitz, Jammal Danishar, Andris Darzins, Deborah Davidson, Paul Davis, Norfreet DaWood, Maxwell de Clifford, Fred de Looze, Antonio de Sousa, Santhramani Devi, John Dickman, Hillary Donald, Barry Dowell, Katrina Dowe, Peter Eizenberg, Claire Eizenberg, Liliana Elberg, Peter Enten, Adolf Erhardt, Roger Fagan, David Fairweather, Noni Ferguson, Peter Ferguson, Colin Fernando, Michael Ferrer, Peter Foley, Sonnie Fong, Peter Francis, Doron Gaddie, Brad Gallagher, Robert Gan, Jon Garland, Andrew Gault, Nick Gianarakis, David Gibson, Ian Gill, Michael Giltrap, Robert Gingold, Neil Gordon, Margaret Graham, Murray Grave, James Grigg, Lynn Hall, Merilie Hall, Kerry Hancock, Colin Harrison, Richard Harrison, Rodney Hayden, Judith Heale, Prue Healy, Eva Herold, Elaine Hirst, Stephen Hodby, Chris Hogan, Peter Horsfall, Allan Hutchinson, Chia Irmgard, Suresh Jain, Duncan Jefferson, Richard John, Therese John, Brendan Kay, Patricia Kelly, Darren Kester, John Khury, John Kirmos, Susan Kloot, Danielle Kolos, Jacqueline Korner, Colin Kratzing, Jana Kubicek, Ashok Kumar, Clive Lacey, Con Lahanis, Daniel Lajoie, Loi Lam, Maryanne Lancaster, Henry Law, Carolyn Lawlor-Smith, Richard Laycock, Ivan Lee, Conway Leung, Leon Levitt, Leon Lewi, James Liew, Stephen Liew, David Lleweslyn, Peter Loth, Eldon Lyon, Shane Maclaren, Clare Maher, Frank Maldari, John Manderson, Linda Mann, Muhammed Abdul Mannan, Frank Marano, Damian Marinucci, Anne Matthews, Clare Matthews, Rebecca McGowan, Larry McGrath, John McKenna, Elizabeth McNaughton, Margaret McNiff, John Meaney, John Menzies, Anthony Michaelson, Samir Mikhail, Geoff Mitchell, Rohan Molenaar, Paul Molloy, Elena Monaco-Mugliston, Clare Mooney, Michael Moor, Brian Moylan, Vajira Nanayakkara, Peter Nathan, Wendy Naughton, Robert Ng, Ken Nicholson, Murray Nixon, Geoff Nuendorf, Chris O'Brien, Paul O'Hanlon, James Olesen, Andrew Ong, Say Gark Ong, Michael O'Toole, Michael Page, Peter Pahuja, Hugh Palmer, Stephen Parker, Stephanie Partridge, Helen Patrony, John Pattison, Gary Pellizzari, Anna Marie Perlesz, David Phillips, Alan Phillips, John Philpot, Leon Piterman, Jock Plenderleith, Harry Preston, Mark Preston, Christopher Priest, Andy Psaradellis, Warner Quarles, Michael Quinn, Jennifer Randle, Collette Reeves, Tamsin Rhodes, Frank Rhodes, Nigel Rosen, Jacqueline Rounsevell, Warwick Rouse, Ernest Rozsa, Indrani Saharay, Joseph Sakowsky, Mahinda Samararatna, Neil Same, Victor Sammut, Les Sands, David Schepisi, Derek Scurry, John See, Jan Sheringham, Keith Shing, Henry Simmons, Hira Singh, Lynette Skardo, David Slonim, Jane Smith, Stuart Smith, Geoff Spurling, Stephen Stowe, Violetta Stoyanova, Subbaram Sundar, Hedley Sutcliffe, Ian Sutherland, Pauline Swan, Jane Tam, Mary Tapsall, Patrick Teh, Stan Theodoros, Susan Thomas, Jon Thomas, Karen Thompson, David Thompson, Mark Thompson, Siobhan Tiernan, David Tillet, Simon Tong, Henry Tran, Ha Tran, Tuan Tran, Ivan Treagus, Ching Tang Tsiang, Trenna Turner, Edwin Turner, John van Bavel, Christopher Verrall, Robert Vorich, Hugh Wall, William Walton, Gary Ward, Bruce Wauchop, Cole Weatherall, Peter Wexler, Andrew White, Gabrielle Wiehle, Robert Wight, Ian Williams, Martin Williams, Stephen Williams, Frank Wilson, Peter Winterton, Steven Wong, Richard Wrennall, Joan Yat, Michael Yelland, Gordon Yip, Nathan Zhou, Michael Ziccone, Barbara Zochowski.

**Austria:** Charles Allen, Gerald Andracher, Marcus Atteneder, Gabriela Barbieri, Johannes Brandstetter, Christian Bsteh, Heinz Peter Deiser, Alexander Doder, Wolfgang Eckert, Astrid Fahrleitner-Pammer, Walter Fiala, Lothar Fiedler, Florian Fiedler, Wolfgang Filip, Johannes Föchterle, Karl Forstner, Karl Freynhofer, Thomas Frieden, Engelbert Frühwirth, Alfons Gegenhuber, Alfred Gewessler, Herbert Goldsteiner, Manfred Grisold, Franz Gruber, Wolfgang Gspandl, Walter Hauer, Michael Herg, Jakob Herk, Günter Heyer, Horst Hiemetzberger, Wolfgang Hof, Johann Hohenecker, Franz Hohensinn, Thomas Honsig, Gerhard Huber, Heinz Hutter, Gabriele Iampaglia-Springer, Karl Itzroiher, Kurt Jenny, Elisabeth Jennull, Michael Jung, Karl Jungbauer, Raimund Kaserbacher, Reinhold Katzenschlager, Josef Kimeswenger, Ernst Kitzler, Gerhard Kitzler, Martin Koschutnik, Harald Kotzmann, Wolfgang Krasselt, Manfred Kuhler, Bernhard Kunauer, Herwig Kunczicky, Susanne Kurzemann, Paul Lachner, Walter Lux, Thomas Maca, Bernhard Mayer, Regina Mika, Beate Mörz, Heidemarie Müller-Ringl, Helmut Nimmerfall, Walter Nowotny, Helmut Ortner, Dieter Pätzold, Thomas Perger, Friedrich Petuely, Peter Pichler, Kurt Pinter, Johann Pollak, Harald Pressl, Susanne Pusarnig, Kveta Pusch, Momen Radi, Manfred Rausch, Siegfried Reisenbichler, Reinold Riedl, Heinz Sattler, Jürgen Schatz, Peter Scheibner, Hans Schimbach, Christof Schmidauer, Dieter Schmidt, Helmut Schossleitner, Martin Schumacher, Josef Schützenberger, Hans Schwaiger, Hans Peter Seit, Gabriele Sepp, Gerhard Stadlbauer, Erwin Hans Steiner, Franz Stradner, Walter Streichsbier, Andreas Summer, Andreas Stümpflen, Ursula Teleky, Kurt Tiesenhäuser, Raffi Topakian, Hermann Toplak, Manfred Türkis, Wolfgang Unterberger, Elisabeth Wais, Heribert Waitzer, Alois Waschnig, Harald Waxenegger, Wolfgang Friedrich Weber, Manfred Weindl, Wolfgang Werner, Eugen Zadra, Elisabeth Zaruba, Wolfgang Ziegelmeier, Klaus Zitt.

**Belgium:** Serge Blecic, Youssef Bouhdid, Patricia Champagne, Willy Coenegrachts, Patrick Cras, Jean-Marie Dalcq, Eric Decock, Antonio Di Mascio, Luc Dieudonné, Robert Dobbelaere, Stephanie Duhoux, Benoit Fesler, Alain Friart, Loui S Gallez, Jean Marie Jaumotte, Sandrine Jeangette, Jean-Michel Knop, Robert Leuridan, Niels Libbrecht, Jean-Marie Massart, Guido Mehuys, Jean-Marie Merlin, Serge Motte, Muriel Sprynger, Justina Surma, Vincent Thijss, John Thoen, Francois Vanholsbeeck, Geert Vanhooren, Joseph Varga, Frank Vermassen, Marc Vermeulen.

**Brazil:** Luiz Ataíde Junior, Jacob Atie, Álvaro Avezum, Francisco Bandeira, Luiz Bodanese, Antonio Brasileiro, Antonio Carlos Carvalho, Roberto Esporcatte, José Péricles Esteves, Angela Maria Eugênio, Gilson Feitosa, Jefferson Fernandes, Alfredo Halpern, Cícero Lopes, Ruy Lyra, Nilton Machado, Léa Maciel, Roberto Marino, Ayrton Massaro, Amélio Matos, Evandro Mesquita, Maria Moreira, Yosio Nagato, José Carlos Nicolau, Paulo Roberto Nogueira, Antonio Pazin Filho, Marco Tulio Pires, Antonio Rocha, Ricardo Rocha, José Francisco Saraiva, Helena Schmid, João Serro Azul, Marcos Tambascia, Sérgio Xavier, Fabio Yamamoto, Winston Yoshida, Maria Tereza Zanella.

**Bulgaria:** Maria Alexandrova, Vesselina Andonova, Ognian Assenov, Penka Atanassova, Valentina Baleva, Haralambi Benov, Vera Bogdanova, Valentin Bonev, Nikolay Botushanov, Tihomir Daskalov, Alexander Daskalov, Ivan Deltchev, Stefan Denchev, Simeon

Dim itrov, Miroslav Di mitrov, Bojidar Dimov, Temenuca Donova, Todor Draganov, Assen Dramov, Elisaveta Enicheynova, Bojidar Fin kov, Krassimir Gen ov, Stefko Georgiev, Svetoslav Georgiev, Zhaneta Georgieva-Tyaneva, Mariana Gospodinova, Valentina Grigorova, Erna Hadjolian, Varbitza Hergeldjieva, Eva Hrants, Lilia Ivanova, Sonya Ivanova Hristova, Darina Kaneva, Zdravko Karagiozov, Sonya Karakaneva-Cholakova, Marko Klissurski, Rumen Kolarov, Mariana Kon teva, Stoyan Lekushev, Detelina Loukanova, Ani Madjarov, Ivan Manchev, Zdravka Maslarska, Haygushi Matosyan-Bogdanova, Georgi Mazhdakov, Teodina Mich eva, Mihail Mihailov, Ivan Milanov, Ivo Milyotev, Evdokia Naidenova, Valcho Naydenov, Eugeni Nedialkov, Galina Nikolova, Mariana Panova, Simona Panteleeva, Zoritza Papazian, Vasilka Pasheva, Atanas Peltekov, Atanas Penev, Stanislav Petranov, Ivo Petrov, Julia Petrova, Elena Petrova, Arman Postadjian, Ivo Raychev, Nizar Rifai, Ira Rousseva, Nikolay Runev, Rumen Runkov, Veselin Rusinov, Penko Shotev, Nina Simeonova, Diana Smilkova, Ivan Staikov, Elena Staikova, Paraskeva Stamenova, Krasimira Stankova, Georgi Stefanov, Varban Stoyanov, Vassil Stoyanovsky, Velislava Ten eva, Snezhanka Tisheva, Latchezar Traykov, Diana Trendafilova-Lazarova, Margarita Tsolova, Galina Tsonevska, Maria Tzekova, Moris Tzolov, Liliana Valcheva, Elisaveta Valcheva, Roumyana Valcheva, Eugenia Vassileva, Vasil Velchev, Tzetzta Velkova, Maria Vlahova, Stefka Yancheva, Zahari Zahariev, Vladimir Zhelev.

**Canada:** Alnoor Abdulla, Glenn Andrea, Catherine Andrew, Guy April, Jeff Ashley, Richard Audet, Ramesh Avinashi, John Axler, Carolyn Baer, Allan Bailey, Greg Banta, Alan Bell, Ira Bernstein, Claude Bérubé, Pierre Bolduc, Jean Bouthillier, Teresa Bree, Gerald Brown, David Caplan, John Chan, William Chan, Chris Chan, Richard Chen, James Cherry, John Chiu, Kenneth Cho, Betty Choi - Fung, Guy Chouinard, Anthony Ciavarella, Christian Constance, James Robin Conway, Mario Côté, Ronald Cox, Gordon Crdinsten, Marie-Josée Cucuzza, Mehboob Damji, John Paul de Young, Langis Dionne, Frank Doane, Jean Duckett, Sylvie Emond, Sheril Esmail, Alan Faiers, Donald Fay, Linda Ferguson, Murdo Ferguson, Gilles Gaudreau, Caroline Geenen, Jean-Paul Gendron, Peter Gianoccaro, Jean Godbout, Yolanda Gonzalez, Shaun Goodman, Krishnasamy Govender, Pierre Goyer, Vojtech Gregus, Jeff Habert, Nader Habib, Sam Henein, Robert J. Herman, James Hii, Michael Hill, Hanna M. Hinnawi, Ralph Hollands, Tommy Hong, Blair Hrabarchuk, Peter Hum, Shiraz Ismail, Naaz Jaffer, Amir Janmohamed, Allan Kelly, Anne Kenshole, Brian Kessel, Jack Kooy, Gilles LaFrance, Sheung-Ying Lam, Daniel Landry, Clement Lang, Luc Lanthier, Christian Lauriston, Claude Lauzon, Denis Lavigneur, Alex Leung, William Lipsitt, Bruce Lubelsky, Lawrence Luftspring, Robert Luton, Patrick Ma, Ariane Mackey, David Marsh, Jean Marie Martel, Altaf Mawji, Pravinsagar Mehta, Kenneth Melvin, Karim Merali, Pierre Meunier, Jeffrey Meyerson, Marie-José Miron, Karl Misik, Peter Mitha, David Morgenthau, Rolf-Dieter Neu, Phuong B. Nguyen, Amarjit Nirwan, Claire Nunes-Vaz, Edward Nykiforuk, William O'Mahony, Michael Omichinski, Marc Paquin, Kalpana Patel, Rajni Patel, Pierre Payer, Alle n Payne, Keyvan Pazuki, Ismail Peer, Claude Phaneuf, Gilles Plamondon, Henryk Pluta, Kent Pottle, Jim Price, Ann Rebane, Thomas Rebane, Claude Roberge, Gerald Rockman, David Rosenberg, Wendy Rosenthal, Julie Ross, Howard Rudner, Salwa Saad, Kevin Saunders, Georgia Savvidou, Nawal Sharma, Wojciech Sobkowski, Eric St-Amour, Brian Strom, Jack Sussman, Christine Szparaga, Paul Talbot, Prafullchandra A. Talwalkar, Lyne Thériault, Graham Turpie, Felix Veloso, George Vertes, Jean Villeneuve, Trevor Vu, Michael Weinstock, Rosemary White, Danny Wong, Wilfred Wong, Daniel Yim, David Yip, Linda Yolles, Bruce Zimmerman.

**Chile:** Monica Acevedo, Fernando Araya, Nelson Barrientos, Victor Bianchi, Eduardo Chavez, Rienze Diaz, Humberto Dighero, Jorge Gajardo, Bernardita Garayar, Berta Garrido, Vicente Guierrez, Arnold Hoppe, Ronald Kauffmann, Albrecht Kramer, Sonia Kunstmann, Leopoldo Manriquez, Eliana Srur, Jorge Tapia, Paola Varleta, Raul Villar.

**China:** Nai Sheng Cai, Shi Ping Cao, Sheng Di Chen, Jilin Chen, Xiaoping Chen, Yan Cheng, Li Ying Cui, Qing Di, Xin Sheng Ding, Zhi Min Du, Wei Fan, Jian Hui Fu, Lu Yue Gai, Wei Gao, Guo Xiang He, Chang Lin Hu, Yin Ning Huang, Shu Wei Huang, Qu an Yue Huang, Dexin Jin, Wei Li, Jin Li, Chun Jian Li, Zhu Yi Li, Jian Wen Lin, Ming Ya Liu, Xin Feng Liu, Ming Liu, Ben Yan Luo, Lei Lv, Ai Qun Ma, Ling Miao, Huan Chun Ni, Guozhong Niu, Guo Guang Peng, Chuan Qiang Pu, Pei Li Pu, Guo Xian Qi, Ming Li Rao, Jie Song, Shui Jiang Song, Xiao Jiang Sun, Qing Ling Tao, Ji Jun Teng, Zheng Wan, Shao Shi Wang, Wei Qing Wang, Yongjun Wang, De Xin Wang, Jian-An Wang, Wei Wang, Li Juan Wang, Jia Ping Wei, Shao Xiang Weng, Zhong Gui Wu, Shi Yao Wu, Chen Bin Wu, Bo Xiao, Feng Xu, Yun Xu, Xiao Wei Yan, Bo Yu, Hu ai Qin Zhagn, Feng Ru Zhang, Bao Wei Zhang, Yong Zhang, Sheng Nian Zhou, Ying Ling Zhou, Jianhua Zhu.

**Denmark:** Erik Agner, Gudrun Boysen, Ole Davidsen, Birger Engby, Jens Jorgen Frifeldt, Per Fruergaard, Karin Geisler, Gyllich Gulliksen, Allan K. Hansen, Palle Holck, Helle K. Iversen, Nils Johannesen, Ole Kahr, Anders Kastrup, Jens Ole Kjærgaard, Ib Christian Klausen, Mads Lessing, Per Lund, Henrik Madsen, Allan McNair, Per Meden, Hans Michley, Hans Mickley, Torben Munk Mortensen, Walter Nielsen, Mogens Odde Kjær, Morteza Oskoie, Jan Petersen, Tina Poulsen, Niels Ralfkier, Frode K Rømer, Mette Sondergaard, Troels Sorensen, Niels Svaneborg, Christian Tuxen, Anette Wildschødt Hansen, Birgit Wolff.

**Finland:** Vooitto Aittola, Juha-Pekka Erälä, Ville Hällberg, Veli-Pekka Harjola, Heikki Huikuri, Raimo Hyytinen, Rainer Icen, Timo Ikonen, Timo Kautila, Juhani Karmakoski, Sirkka Keinänen-Kiukaanniemi, Raimo Kettunen, Paula Kohonen-Jalonen, Juhani Koistinen, Päivi Korhonen, Petri Korkeila, Ilkka Kuisma, Mikko Laaksonen, John Melin, Markku Nissilä, Jorma Ohisalo, Osmo Pammo, Juha Puranen, Mikael Railo, Arto Rantala, Marja Repo-Outakoski, Erkki Säkö, Olli Sallinen, Arto Strandberg, Sakari Sulosaari, Jyrki Taurio, Marja-Leena Tuominen, Antti Virkamäki.

**France:** Leila Abdi-Kriaa, Nathan Abenheim, Philippe Aerts, Laurent Aigle, Jean-Paul Albert, Alain Albouy, Anfari Ali-Mirode, Jacques Allix, Marc Amendola, Gerard Amigues, Hafid Amougay, Pascale Anderson, Pierre Andreani, Claude Antoine, Claude Arnold, Michel Arnould, Marie-Anne Arrondel, Pierre Attali, Raymond Attuill, Pierre Aubois, Michel Aucouturier, Monique Audibert, Patrick Audouy, Christian Auge, Jean Rene Auriault, Jean-Luc Azoulay, Philippe Bachongy, Georges Badoc, Michel Baehrel, Christophe Baer, Olivier Baissas, Youssef Barada, Marc Baragnon, Charles Baranes, Marianne Barbellion, Guy Barberet, Alain Bardoux, Jacques Bargier, Antoine Bariaud, Claude Barjhoux, Fabrice Baron, Denis Baron, Stephane Bartoli, Philippe Bayle, Charles Beck, Christian Bell, Olivier Benais, Herve Benichou, Jean-Louis Bensoussan, Vincent Benvenuto, Philippe Berdague, Patricia Bernet-Bernady, Jean-Marc Bernier, Gilles Berrut, Nathalie Berto, David Berville, Philippe Bessette, Thierry Betta, Gilles Bindler, Guy Birry, Olivier Bisch, Michel Bismuth, Philippe Blanc-Vannet, Pascal Blouin, Henri Boccalon, Pierre Jean Bodiou, Thierry Boely, Eric Boely, Georges Boitelle, Thierry Bontemps, Claude Bortolotti, Delphine Bortolotti, Gerard Bosselut, Marc Bouche, Philippe Bouche, Henri Bouchetoux, Philippe Boulanger, Amina Bourahoui, Michel Bourgoin, Francois Boutelier, Eric Bouffol, Philippe Boyer, Pierre Boyer, Agnes Brachet, Olivier Brafman, Rene Brassac, Nicolas Breton, Isabelle Bringer-Raingear, Jean Broussaud, Françoise Broutin, Claude Brunaud, Philippe Bruneau, Olivier Brunet, Daniel Buchon, Philippe Buffler, Jean Cabane, Didier Cadinot, Andreia Calmeiro, Alain Campagnac, Jerome Campagnac, Thierry Canali, Marie Elizabeth Cano, Pascal Canu, Dominique Caparros, Cyril Cardon, Muriel Carlotti, Francois Carniaux, Pascale Carre, Michel Casanova, Isabelle Casanova, Bruno Casedevant, Marc Castaner, Jacqueline Castany, Benoit Cauchy, Pierre Causse, Christine Cavat, Philippe Cayron, Marie Anne Cazale-Richier, Christian Cazals, Christophe Cazard, Bruno Ceccarelli, Pierre Cerda, Christine Cerna, Pierre Chabreron, Patrick Chaloux, Alain Chaleon, Alain Chalvignac, Raymond Chaperon, Pierrick Chaplain, Stephane Chapuis, Laurent Charbonnel, Pascal Charbonnel, Marie

Françoise Chatelet, Christian Chauvois, Michel Chay, Patrick Chemouni, Chabane Cherbi, Jean Marie Chevalier, Jean-François Cheynel, Bernard Chiausa, Remi Choussat, Michel Chretien, Isabelle Cibois-Honorat, Luc Cimini, Serge Cini, Christian Claudel, Yvon Claudel, Gerard Codron, Thierry Coeure, Monique Cohen, Samuel Cohen, Jean-Philippe Cohen-Bacry, Felix Cohen-Seban, Marie-Pierre Coispeau, Herve Colin, Jean Philippe Collet, Anne Colobert, Robert Combet, Philippe Conchonnet, Claude Conri, Bernard Coppe, Claudine Cordier, Francis Coriol, Isabelle Coriol, Vanessa Corre, Stephane Cossou, Alain Costargent, Marc Cothenet, Jean-François Cottencin, Yves Cottin, Gilles Couderc, Jean-Pierre Coureges, Bertrand Cuisinier, Emmanuel Custoza, Laurence Dages, Simon Dahan, Patrick Dary, Christophe Daumas, Marie-Laure Daumas, Michel David, Alain de Almeida, Antoine de Guibert, Emmanuel de Joux, Bernard de la Grandville, Erik de Mautort, Etienne de Saint-Martin, Joelle Debout, Olivier Decloux, Françoise Defrance, Frederick Defrey, Maryse Degailh, Edith Delan, Thierry Delandre, Irene Delbachian, Alain Delcros, Dominique Defosse, Christian Delplace, Bruno Dely, Jean-Claude Deme, Marie-Helene Demortiere, Paul Denouville, Michel Depoisier, Gerard Depret-Bixio, Max Derochet, Sylvie Descombes, Jean-Pierre Desgranges, Pascal Dessales-Quentin, Jacques Dewulf, Bernard Dimon, Patrick Doat, Jean-Philippe Doazan, Jean-Yves Doerr, Andre Domenech, Valerie Domingo, Erwan Donald, Catherine Dormard, Bernard Doucet, Dominique Dreux, Bruno Dubedout, Jean-Christophe Ducarme, Gerard Duclos, Gerard Dugny, Philippe Dumond, Thierry Duand, Pierre Dupouy, Jean Pierre Dupre, Olivier Dupuy, Thierry Durantel, Jean Francois Durbiano, Patrice Dutilleul, Marc Duval, Lou is Duvochel, Verena Eckert, Dominique Edet, Jean-Michel Ehrlich, Pierre Eisele, Chantal Elbhar-Pouchoue, Brigitte Escourrou, Pierre Espinasse, Jean-Christophe Etienne, Joel Etienney, Francois-Xavier Eveillard, Dominique Eveno, Christian Fabregue, Salam Farhat, Corinne Fauchard-Renard, Veronique Fauchier, Sandrine Favre, Patrick Fayard, Israel Feldmann, Dominique Felten, Pascal Ferchaud, Daniel Feret, Nicole Ferreira-Malident, Renaud Ferrier, Jean Ferrieres, Jean Feuillet, Christian Fivel, Christelle Fleury, Michel Flizot, Marc Flosi, Eric Foltzer, Xavier Fontaine, Remi Fonteny, Bertrand Forestier, Michel Forne, Andre Fortis, Christiane Fouillat, Bruno Fouillen, Yves Andre Domenech, Valerie Domingo, Erwan Donald, Marc Franchet, Agnes Francillotti, Christian Francois, Magali Frayssinhes, Jean-Luc Gabrielli, Pierre Galy, Jerome Garnier, Pierre Garnier, Eric Garnier, Eric Garrel, Christian Gasiot, Isabelle Gaudisart-Amblard, Bruno Gauthier, Philippe Gay, Dominique Genoud, Bernard Geoffroy, Philippe Germain, Olivier Geronimi, Luc Gilles, Henri Gin, Pierre Ginestet, Jean Paul Giorgi, Charles Giraldi, Christian Girard, Michel Gissler, Vincent Gleye, Isabelle Glorieux, Laurent Goepfert, Marie Chantal Gournay-Lahoussine, Paul Gouyon, Michaela Grabovescu, Philippe Grange, Serge Michel Gran-Ortiz, Jean-Paul Grazzini, Dominique Grevet, Bruno Grivet, Francois Grivet, Remy Groell, Marc Grohar, Gilles Grollier, Pierre Gros, Bernard Gros, Sabine Grutter, Gerard Guichard, Robert Guilhaertze, Herve Guillaumeot, Daniel Guillemot, Claude Haller, Claudine Hamel-Desnos, Edward Hannoush, Michel Harroch, Jean-Claude Haus, Manuela Hebert, Eric Helms, Marc Hemocq, Frederic Henriot, Bruno Henry, Marc Herent, Robert Hertling, Philippe Hild, Christine Hild, Hassan Hosseini, Jean Claude Houcq, Jean-Luc Hovine, Jean-Louis Huberschwiller, Remi Huet, Dominique Huet, Thierry Humbert, Didier Ihli, Jean-Louis Iriart, Yves Jacamon, Sophie Jacqueminet, Valerie Jacques, Cecile Jacquet, Jean-Pierre Jacquet, Alain Jacquot, Jean Francois Jamet, Dominique Jamilloux, Lise Jappy, Pierre Jaudon, Françoise Jean, Georges Jean, Frederic Jeanjean, Claude Jedynak, Franck Jonot, Eric Jordan, Thierry Joseph, Christine Jouin, Pierre Jourdan, Jean-Thierry Jusserand, Edmond Kaltenbach, Anne Kerharo-Nicolas, Abbes Khennouf, Catherine Kleimberg, Didier Kleimberg, Pierre Kohser, Arnaud Koubbi, Michel Krempf, Pierre Kuhn, Christophe Kurtz, Francois Lacoin, Valerie Lagrange, Stephane Lahoussine, Patrick Lambert, Jean-Michel Lamperin, Georges Lanusse-Cazale, Christine Largillier, Daniel Lascaux, Robert Latour, Jean-Michel Lauer, Dominique Lauga, Francis Lauhe, Jacques Launay, Marie-Paule Laur, Bruno Laureille, Philippe Laurent, Françoise Laurent-Montero, Philippa Lavallee, Marie-Catherine Lavigne, Claude Le Devehat, Raphael Le Diagon, Jacques Le Du, Stephane Le Mouel, Dominique Lecaignard, Christophe Lecarme, Florence Leclercq, Victor Lecue, Francois Ledru, Denis Lefort, Christian Legrand, Anne-Marie Leguerrier, Jacques Lelgouarch, Laurent Lemaire, Maurice Lemaire, Patrice Lemaire, Bruno Lemarie, Bernard Lemettre, Philippe Lemoine, Michel Lenormand, Jean-Luc Lepoutre, Maurice Lerich, Jean-Michel Lerouge, Monique Lescoute-Jabot, Pierre-Yves Letellier, Jean-Marie Letzelter, Michel Leveque, Marc Levy, Bernard Levy-Casson, Pierre Leygnac, Jean-Paul Lhosmot, Francois Liard, Alain Lion, Jean Locquet, Jean-François Loewert, Boris Lormeau, Jacques Louis, Alain Louison, Pascale Louveau, Michel Louy, Gerard Lussiana, Pascal Mabire, Yvan Machero, Francisco Macian-Montoro, Christian Magnaval, Patricia Magnus, Martine Maillan-Martin, Philippe Mainetti, Christian Mallemond, Philippe Mallet, Patrice Manigold, Philippe Marchand, David Marciano, Jean-Louis Marger, Bernard Marino, Philippe Marissal, Philippe Martial, Remy Martin, Jacques Martin, Michel Martin-Perdier, Helder Martins, Gregoire Martocq, Jean-Jacques Masson, Isabelle Mathys, Yves Maupin, Daniel Maury, Antoine Medvedowsky, Patrick Meimoun, Yves Mercey, Alain Mercier, Christian Meresse, Patrick Messner, Marianne Metivier, Bruno Meyrand, Jerome Mezin, Bozena Michalak, Christian Michel, Philippe Michellier, Didier Milhaud, Mohamed Mohsen, Jean-François Molinier, Michel Molinier, Gerard Mollet, Jean Molleville, Paul Monsegur, Frederic Monthein, Raphael Moreno, Didier Moritz, Paul Morvan, Jean Mottin, Betty Mougnot-Pierson, Herve Moura, Pierre Mours, Pascal Moussu, Patrick Moutier, Mahmoud Mteirek, Jean-Joseph Muller, Eric Nabedian, Jonas Naybodokama, Jean-Philippe Neau, Marc Nejman, Jacques Nerson, Pierre Nevians, Bruno Nguyen, Jean-Luc Nicodeme, Luc Niel, Elisabeth Nivellean, Richard Noel, Jean-Claude Nusimovici, Desire Obadia, Thierry Oger, Alain Olive, Charles Olivier, Pierre-Louis Olland, Daniele Orenstein, Alain Outterycq, Jean-Marie Pabst, Didier Pachod, Eric Page, Francois Paillard, Jean-Eric Panacciulli, Didier Paneau, Claude Paradis, Daniel Parent, Marc Paris, Christian Pellenc, Alfred Penformis, Charles Antoine Percheron, Gerard Perez, Antonia Perez-Martin, Beatrice Perin, Dominique Pernin, Philippe Perreur, Eric Perrier, Bernard Perrin, Jean-Louis Perrotel, Michel Perrousse, Valerie Perroux, Laurent Petit, Olivier Petit, Jerome Peyraud, Jean-Michel Philipp, Frederic Philippeau, Yves Picard, Jean-François Piera, Marc Pieretti, Joel Pierini, Eddie Pierre-Justin, Philippe Pietri, Denis Pinaud, Jean-François Pinel, Guillaume Pinel, Francois-Xavier Pinson, Christophe Piot, Marc Antoine Pistorius, Michele Pithon, Anni Pithon, Pascal Plan, Jean-Noel Poggi, Philippe Poinot, Patrick Poisson, Alan Poquet, Yvon-Yann Pouedras, Françoise Pouedras-Raton, Michel Pouget, Jacques Pourcin, Regis Pradeau, Jacques Prat, Christiane Prat-Caillo, Thierry Prieur, Bernard Prijac, Jean-Michel Proville, Alain Pucheu, Jean-Bernard Pueyo, Charles-Philippe Puiggali, Francis Pujol, Jacques Quadrelli, Alain Queguiner, Isabelle Quere, Fabrice Quillou, Anne Quinquempois-Kaminski, Francois Rabut, Sanae Rahili-Pollette, Jacques Rambaud, Pascal Raucourt, Sylvie Ravel, Philippe Ravoire, Serge Rebiere, Serge Rebmman, Jerome Regnier, Marie-Therese Reichard, Jean-François Reinard, Pierre Reins, Adrien Remade, Jean-Jacques Remeriers, Jean-François Renucci, Jean-Luc Reny, Yves Ressen, Georges Reumont, Jean-Luc Reynier, Christel Riera, Jean-François Rietsch, Marc Ripoll, Patrick Ritz, Jean-Pierre Robert, Jean Robert, Dominique Robert, Francois Robin, Christian Roche, Gilles Rodier, Jean-Jacques Roger, J. Francois Rolland, Eric Romen, Jean-Luc Rondeau, Gilles Ronziera, Andre Roques, Sophie Rosenberg, Frederic Rosier, Eugenio Rosset, Eric Rouchaud, Camelia Roudiere, Ronan Roussel, Aime Rousset, Gerard Rouviere, Marcel Ruetsch, Marc Ruivard, Didier Sacareaux, Jean-François Sagez, Dominique Saillard, Patrick Salerno, Antoine Salloum, Martin Salzmann, Jacques Samat, Nabil Saouma, Herve Sarfati, Jean-Pascal Sastoune, Jean-Louis Saunier, Alain Saurat, Desire Savoyen, Christian Scellier, Christian Schaal, Pierre Schatzkine, Andre Schmitt, Christian Schnebelen, Raymond Schordan, Katia Schroeder, Yves Schultz, Rodolphe Schwab, Christophe Seinturier, Sylvie Sement,

Daniel Senk, Isabelle Sesoren, Jean-Francois Seveyrac, Olivier Simorre, Pierre-Francois Sinoir, Gerard Slama, Gilles Sorbe, Francis Soret, Sandrine Soria-Berdugo, Philippe Soskin, Jean-Claude Souлары, Patrick Spiess, Francois Spilthooren, Marc Steinberger, Jean-Jacques Stoll, Alain Stoll, Patrick Strentz, Noel Tallet, Denis Taminau, Sunhok Tan, Michel Tap, Philippe Tarouel, Patrick Ta verne, Elisabeth Templier-Gauthier, Michel Terrail, Jean-Pierre Terrien, Jean Theoule, Pascal Tiberghien, Kiet Phong Tiev, Remy Tisserand, Judah Toledano, Bernard Tomaszewski, Corinne Toto-Grisoni, Pierre Touzet, Eric Tricoire, Francois Tricot, Pierre Triot, Thierry Valette, Elodie Vandooeren, Christine Vanhoutte, Stephane Vanier, Frederic Vayre, Jose Vedrenne, Paul Venjus, Gabriel Venturini, Erick Verlet, Gilles Verney, Jean-Francois Vernhes, Michel Verquerre, Jean-Christophe Viale, Rodrigue Vienne, Philippe Vigier, Jean-Luc Vignoulle, Laetitia Villon, Christian Vincey, Jean Yves Vogel, Patrick Vogt, Jean Vonarx, Manh-Hung Vuong, Jean-Luc Weigel, Christian Wencker, Nathalie Wey, Philippe Winter, Veronique Wodey, Jean-Louis Wurtz, Frank Yoh, Stephane Yvenov, Antoinette Zakounne, Gilles Zamaria, Fernandez Zerbib, Patrice Zoro.

**Germany:** Patrick Abdul-Malak, Christoph Abel, Michael Achatz, Sahika Akalin, Christian Alexander, Hendrik Altenkämper, Manuela Andres, Christoph Angenwoort, Matthias Appy, Cord Arkenau, Martin Bach, Stefan Baier, Claus Ballstaedt, Constantin Baran, Marius Barbuia, Christian Barho, Alexandra Bassen auf dem Brinke, Oskar Bauer, Martin Bauersachs, Clemens Bauknecht, Isabel Baumann, Christian Beck, Rudolf Becker, Hans-Joachim Becker, Helmut Beermann, Dieter Bemann, Sibylle Berdermann, Olaf Besser, Ronald Beyer, Rainer Birke, Michael Bodammer, Ralf Bodenschatz, Michael Bögel, Jan-Peter Bohé, Günter Böhm, Jörg Böhme, Christina Boncke, Andreas Bonenkamp, Snezana Booz, Andreas Börgmann, Rudolf Brachmann, Bernadette Brado, Hans-Joachim Braun, Ralf-Markus Braun, Heinz Hubert Breuer, Stefan Brockmann, Friedrich Bröer, Berthold Bronder, Gabriela Brück, Heribert Brück, Claudia Brückmann-Stautner, Christoph Brückner, Stephan Brune, Petra Buchholz, Rudolf Buchkremer, Karsten Bunge, Udo Burczyk, Gudrun Burgei-Seifert, Hans-Martin Busch, Lutz Buschmann, Ulrich Butz, Andreas-Christoph Cebulski, Rainer Clob, Klaus Copenrath, Dominik Cornely, Dominik Daikeler, Jens Daniel, Andreas Daxer, Walter Deeg, Heinz Degering, Christian Delank, Karsten Diehls, Fred Dobiasch, Martin Dobner, Adel Doumit, Christoph Drechsler, Rainer Dresler, Holmer Drews, Karsten Droese, Jens Drummer, Regina Drzymalla, Joachim Du bowy, Martin Dürsch, Frank Du sold, Klaus Ebeling, Hans-Holger Ebert, Dietmar Eckert, Verena Eckert, Rolf Eichner, Josef El Shamsy, Nicole Eltges, Erich Emde, Peter Engeser, Aman Esmaty, Hannelore Exner, Ulrich Faber, Herbert Facius, Dirk Falkenhahn, Thomas Feldmann, Gottfried Fiala, Andreas Fiedler, Manfred Finck, Jörg Finkenthe, Herbert Fissan, Ulrich Fleischer, Klaus Flohr, Dirke Franke, Heidrun Franke, Robert Franz, Frank Franzmann, Udo Frees, Michael Freimuth, Dierk Freundl, Ansgar Frieling, Barbara Froehlich, Anja Fröhlich, Michael Frommhold, Helmut Garten, Jenny Gärtner, Uwe Gerbaulet, Andreas Gerhardt, Thomas Gerlach, Walter Glaser, Heinz Glomm, Jürgen Glös, Ulrich Godt, Gholamreza Goudarzi, Oliver Grams, Klaus-Dieter Greie, Andreas Grosschaedl, Josef Grobkopf, Ludwig K. J. Grün, Ekkehard Grützner, Hans-Georg Grzeschik, Joachim Haaf, Maria Haas-Weber, Gerold Hadlich, Klaus Hafender, Andreas Hagenow, Wolfgang Hahn, Dieter Hailer, Michael Hammerl, Ulrich Hanselle, Sabine Hansen, Michael Hardt, Ralf Hauer, Liane Hauk-Westerhoff, Ernst Richard Hauser, Jan-Pieter Hecht, Christoph U. Hedtkamp, Voker Heffler, Diethard Heilmann, Thomas Heintl, Ullus Heinrich, Gerd-Ulrich Heinz, Susann Henke, Wolfgang Hentrich, Harald Herber, Jürgen Herbers, Heinz Herbst, Georg Herman, Peter Hertzner, Wolfgang Herzog, Hans Hess, Carsten Hebeling, Martin Hestermann, Markus Heyenbrock, Silke Hietkamp, Peter Hildebrand, Manfred Hilgedieck, Matthias Hofmann, Hartmut Hohensee, Evelyn Hohnstein, Herbert Huch, Gerhard Humke, Rudolph Hündgen, Hendrik Hüning, Rolf Huntemann, Wolfgang Huppertz, Thomas Hütt, Horst Huttner, Werner Ihle, Stefan Jacobi, Johannes Jäger, Bernd-Ulrich Jäger, Norbert Jahnke, Andreas Jankowski, Sybille Jänsch, Dirk Jesinghaus, Judith Jeske, Martin Jung, Gerhard Jungblut, Ulrich Junge, Wolfgang G. Jungmann, Jost Kaiser, Wolfram Kaiser, Martin Kajzar, Tuca Karakas, Erdogan Karatay, Sabine Karl, Karim Kaviani-Nejad, Nader Kayali, Thomas Keienburg, Horst Keller, Guido Ralf Kebler, Andreas Kirsch, Christiane Klein, Michael Klein, Axel Kleinert, Arthur Klementz, Johann-Wilhelm Klöpfer, Eva Kmoth, Olaf Knispel, Erich Knobloch, Volker Koch, Stephan Kochen, Wilfried Kochhäuser, Andreas Koepfel, Steffen Christian Kohl, Andreas Köhler, Christian Köhler, Klaus Kohlhas, Ralph D. Köhn, Kai Könemann, Ariana Konschak, Annette Konstanzer, Ute Kopplin, Tillmann Kornadt, Robert Kortas, Thomas Kossow, Katja Kraaz, Alfred Krämer, Gudun Krause, Peter Kreckel, Klaus Kretschmer, Stephan Kretschmer, Wolf Kretschmar, Christian Krupp, Reinhard Kuhn, Richard Kuhnen, Heike Kunert, Steffi Kunze, Doris Küther, Cornelia Kutscherskij, Beata Kutz, Susanna Labitzke, Hans-Joseph Lang, Thomas Lange, Laurentius Lanta, Christoph Lanzendörfer, John E. Lasana, Suso Lederle, Kurt Lempke, Martin Lenfers, Ute Lenk, Matthias Leyer, Ina Lipp, Regina Lippert, Berthold Litzinger, Bruno Löplich, Konrad Lössl, Sabine Ludewig, Guido Ludwig, Stefan Lukanek, Martin Mägdefrau, Roman Mantaj, Martin Markreiter, Fares Martak, Toralf Marten, Angela May, Herbert Mayer, Uwe Meier, Stefan Meier, Eveline Meinecke, Uwe Meinung, Eckhardt Meisel, Michael Meibner, Ulricke Merbach, Harald Messner, Friedrich H. Methfessel, Bernd Metscher, Horst Meub, Brigitte Meyer-Bender, Ludger Mickel, Andreas Mietaschk, Wolfgang Mohr, Siegfried Molzahn, Christina Mondorf, Roland Monrell, Margarethe Moritz-Lippmeyer, Walter Müller, Uwe Müller-Bühl, Roman Mura, Ronald Naumann, Karl-Heinz Nedder, Andrea Neeff, Peter Nehrig, Alya Neu, Eberhard Neumann, R. Manfred Neumann, Hans-Peter Nikolaus, Lennhart Nissen, Rüdiger Nold, Ralf Oertel, Helmut Ofer, Rainer Offermann, Günter Opel, Thomas Opitz, Bernd Ostmann, Peter-Michael Pankow, Rüdiger Patschan, Andreas Pätz, Albrecht Pellens, Roswitha Perlwitz, Karl-Heinz Pfetsch, Bernd Philippi, Nicola Piepenbrock, Joachim Pinterowitsch, Bärbel Pohle, Axel Poll, Christian Pomiersky, Bettina Poten, Ernst Prange, Annegret Preissner-Kiebling, Horst-Dieter Püls, Peter Puth, Rainer Püttbach, Holger Pütz, Rita Quosigk, Hubert Raab, Rami Rabahieh, Reinhard Raddant, Friedrich Ramm, Günther Rapp, Klaus P. Ratzmann, Michael Rau, Wolfgang Rautenberg, Thomas Reiff, Norbert Reike, Bernd Dieter Reinhard, Albert Reischl, Ute Rentz, Andreas Reul, Eberhard Rieker, Stefan Ries, Volker Rink, Claus Eric Rippl, Ulrich Rissel, Ulf Ritter, Silke Röhl, Hartmut Rohlfing, Monika Röhrich, Anette Rosenthal, Verena Roth, Michael Roth, Ursula Rotsel-Schäfer, Martin Rottenberger, Klaus Rudolph, Hermann Ruider, Dieter Ruland, Heidrun Rupp, Johannes Rüter, Verena Rüthein, Anita Sach, Ali Safavi, Peter Sagemüller, Uwe Sakrib, Arshad Sayegh, Thomas Schäfer, Helmut Scharrel, Gottfried Schellenberg, Wulf Schenk, Oliver Schifffmann, Josef Schimek, Karola Schladitz, Jürgen Schlegel, Matthias Schlick, Hans-Joachim Schlüter, Gabriele Schlüter-Block, Günther Schmid, Sebastian Schmidtke, Kerstin Schmiedberg, Georg Schneider, Klaus Schnittert, Michael Schnittert, Norbert Schöll, Matthias Scholz, Dirk Schön, Norbert Schön, Sabine Schöne, Wolfgang Schönecker, Joachim Schönen, Thomas Schönfelder, Eleonore Schönrock, Matthias Schreiner, Mark Schreiner, Johannes Schriek, Thomas Schröder, Bernd Schröder, Peter Schröder, Wolfgang Schröter, Doris Schulte, Klaus Schulten, Dietmar Schultz, Andreas Schumacher, Joachim Schuster, Manfred Schütz, Heinrich Schwadorf, Toralf Schwarz, Hans-Götz Schweighöfer, Lorenz Schweyer, Bernd Sczesni, Per Segebrecht, Bringfried Seidel, Karin Seifert, Hans-Peter Seifert, Anne-Monika Seiler, Christoph Seitz, Ingo Senfleber, Jörg Simon, Almut Sindl, Lutz Sinn, Ulrich H. Sinning, Ulrich Sliwka, Thomas Sommerlatte, Tirapol Sorncharoen, Wolfgang Sperle, Alfred Spitzer, Detlef Städt, Jens Stadtmüller, Angela Stahl, Andreas Stegner, Wolfgang Steiner, Jörg Stein, Jörg Steindorf, Michael Steinle, Andrea Steinmeier, Günter Stenzel, Klaus Stiegler, Bettina Stöcking, Hans-Georg Stohrer, Hans-Jürgen Stroh, Gerson Strubel, Janusz Swistowski, Angelika Tägder, Jens Taggeselle, Gunnar Taubert, Sven Tauchert, Maria-Elisabeth Thamm, Gerhard Thiel, Manuela Thinesse-Mallwitz,

Jochim Thum, Martin Tietz, Karin Todoroff, Evelyne Traub-Bobrich, Steffen Tröger, Ulrich Tuchscherer, Bruno Tulaj, Andreas Turowski, Stefan Tymiec, Evelyne Udvari, Gertrud Ullrich, Christine Unger, Ingeborg Utz, Peter van Hasselt, Robert Villis, Achim Vogt, Cornelia Völckers, Jan Völker, Thomas Völler, Peter Baron von Bilderling, Stephan von Molitor, Andreas Voskamp, Annette Wagner, Bernd Wagner, Friedrich Walther, Csila-Maria Weider, Bernd Weier, Jens Weilacher, Cornelia Weirich, Rainer Weislogel, Götz Weissinger, Matthias Wenck, Jürgen Werner, Manfred Werner, Georg Weyers, Kurt Wiedemann, Marie-Luise Wiedemann, Susanne Wiegank, Eckhard Wilbrandt, Wolfgang Wildenauer, Birgit Willers, Wolf-Rüdiger Winter, Dieter Wirtz, Hermann F. Wissmüller, Claus-Henning Wolde, Mandy Woschek, Martin Wunderlich, Volker Zeese, Volker Zens, Klaus Zimmermann, Ado Zorn.

**Greece:** Georgia Asimi, Christos Bakalis, Charalambos Bakopoulos, Dimitrios Balis, Konstantinos Baltatzis, Athanasios Basdekidis, Ioannis Caraindros, Agni Chatsiou, Periklis Chatziannidis, George Dakos, Georgia Dantsi, George Deligianinis, Athanasios Demiris, Ioannis Dermitzakis, Chrisoula Dima, Christos Dimitriadis, Michael Fatsis, George Floros, Apostolos Garbis, Ilias Georgiadis, Nikolaos Georgiannis, Theodoros Groutsis, Lazaros Kapatianakis, Nikolaos Kapsoudas, Sofia Karabali, Dimitrios Karagiannis, Sylvia Karalioliou, Aggelos Klitsas, Nikolaos Kotsis, Paris Koulouzakis, Stilianos Ktistakis, Simeon Liberakis, Eftimia Mandalaki, Alekos Manolakas, Alexandra Maranga, Nikolaos Markoglou, Nikolaos Meramvliotakis, Christos Milopoulos, Nikolaos Mimilas, Ioannis Moschonas, Ioannis Navrouzoglou, Panagiotis Panagiotopoulos, Dimitrios Papaconomou, Nikolaos Papatheanasiou, Irini Pappa, Dimitrios Parisis, Charalambos Petras, Ilias Petropoulos, Nikolaos Pontikakis, Charalambos Pontikis, Georgios Ragias, Spiros Rigas, Panagiota Riza, Panagiotis Sabatakakis, Viron Sitis, Andreas Skanavis, Fotini Skirla, Michalis Sotiriou, Michael Stakiadis, Sonia Stilianoudaki, Anna Syrigou, Ioannis Tachmatzidis, Konstantinos Takis, Pagona Tassopoulou, Konstantinos Tekos, Antonis Theodorakis, Ilias Theodoropoulos, Theofrastos Tsakiris, Maria Tserkezou, Ioannis Varnavas, Pavlidou Venetia, Nikolaos Vrachnakis, George Ziros, Ioannis Zouberis.

**Hong Kong:** Chi Keung Au Yeong, Norman Chan, Kin Choi, Shu Lap Chow, Chor Lup Chu, Hau Kwong Chung, Victor Goh, Yim Fai Kong, Chi Sing Ku, Alexander C. K. Lam, Yuk Tong Lau, Chi Wing Lo, Wing Fai Ng, Peter Tong, Wing Kwong Tong, Chun Au Tsang, Hing Sing Tsui, Bun-Lap Wong, Wing Kwong Wong, Yu Kai Yu.

**Hungary:** Agnes Adam, Gabor Antalics, Vilma Balas, Erika Barfai, Zsolt Bartha, Monika Bata, Bela Bernath, Imre Bodnar, Imre Csomos, Melinda Csordas, Eva Czuczka, Laszlo Darvai, Ilona Dulai, Gyorgy Eberling, Veronika Endre, Katalin Farkas, Gyongy Foldesi, Sandor Forgacs, Boldizsar Garai, Gyorgy Gergely, Istvan Gubucz, Ildiko Hajdara, Jozsef Hamvas, Peter Harcos, Agnes Hasitz, Gyula Hegedus, Marianna Hegyi, Zsuzsa Hermann, Katalin Jakab, Istvan Juhasz, Krisztian Juhasz, Gal Katalin, Andor Keresztes, Istvan Kosa, Agnes Kovacs, Jozsef Lakatos, Laszlo Lippai, Tibor Lovasz, Geza Lupkovics, Anna Magyar, Eszter Magyarosy, Tamás Major, Attila Makai, Rozalia Marton, Katalin Mede, Edit Metz, Marta Molnar, Aniko Muranyi, Zoltan Nagy, Maria Olasz, Katalin Paulo, Ildiko Penner, Zsuzsanna Revesz, Pal Roth, Szilveszter Rozsa, Csilla Sarkadi, Judit Semjen, Tas Attila Sipos, Eva Sitkei, Gusztav Strebely, Zsolt Sudar, Zoltan Szabo, Szabolcs Szepesvari, Geza Toth, Gabor Trapp, Arpad Zsigmond, Zoltan Zuberecz.

**Indonesia:** John Adam, Achdiat Agoes, Ira Andaningsih-Rahardja, Robert Arjuna, Ahmad Asdie, Achmad Basyah, I. Gusti Ngurah Ketut Budiarsa, Djokorijanto Dirjaningrat, Robertus Djokomoejanto, Mochammad Fathoni, Billy Indra Gunawan, Margono Achyar Hendromartono, Laksmi Asanti Kadarjono, Harmani Kalim, Isfanuddin Nyak Kaoy, Sjukri Karim, Sutomo Kasiman, Dede Kusmana, Charles Limantoro, Robertus Arifin Limoa, Augusta Lukman Arifin, Lukman Hakim Makmum Mardianto, Djoko Maryono, Irmalita Mazwar, Jusuf Misbach, Paskalis Nangoi, Handoyo Pudjowidyanto, Hari Purnomo, I. Gusti Ngurah Putra Gunadhi, Dani Rahmawati, Sodikur Rifqi, Kiking Ritarwan, Anwar Santoso, Teguh Santoso, Suratno Sastrosukarno, Siti Setiati, Suroto Setijorumecko, Yanuar Soehartono, Djadjang Suhana, Josef A. Hendro Susilo, I. Nengah Dwi Sutanegara, Aulia Syawal, Sutikno Tanuwidjaja, Trisulo Wasyanto, I. Wayan Wita, Hans Cahyadi Yeo.

**Interlatina:** Ana Cecilia Arango, Jorge Arauz Chavarria, Aron Benzaoud Cohen, Jose Cabrera, Boris Castillo, Edith Haydee Chavez Huapella, Chih Hao Cheng Ku, Ernesto Diaz Alvarez, Rosa Eliana Dina Jimenez, Hernan Espinosa, Sandra Natacha Espinoza Cedeño, Carlos Eduardo Heredia Rivera, David Hernandez, Jorge Hernandez, Julia Lucy Madrid Alvaro, Felix Medina, Jose Alberto Minchola Haro, Miguel Mini, Guido Molina, Javier Moya, Miguel Esteban Ortiz, Alexander Parajeles, Clemente Alberto Ramos, Edgar Rodriguez, Gustavo Luis Saravia Risso, Jose Mario Sprok, Diego Ricardo Tapia Villagomez, Jaime Tortos-Guzman, Victor Urrutia, Dario Veras Sanchez, Jean Paul Vercauteren Dupont, Pablo Villa-Garcia Martinez, Mary Vinocour.

**Israel:** Aviva Abramovitz, Sharon Amar, Ram Avrahami, Aya Biderman, Nataly Davidov, Dana Faibel, Oro-Nory Flechner, Frida Glikberg, Marion Hefer, Yaakov Henkin, Edith Klain, Roza Kleiman, Batya Kornboim, Tatiana Lev, Pircha Levie, Abu-Katash Mahmoud, Ayelet Mendelson, Lea Mor, Zvi Chalom Moran, Gila Nitay, Irine Ostrovski, Yaakov Pshetizkj, Ayala Reinitz, Hannah Reiss, Raisa Rivkind, Larisa Roch-Klipper, Dorith Rosner-Kamana, Tilda Sabah, Maya Schuldman, Eran Segal, Irena Shtraikher, Bernadiner Sophia, Ilan Strausberg, Michael Umansky, Selma Wainsztock, Eli Wertmann, Dorota Wrobel-Zaher, Cherna Zeltzer, Constantin Zhuravlove, Grigory Zibuleusky.

**Japan:** Koji Abe, Nobuyuki Abe, Masayoshi Adachi, Hisashi Adachi, Hideaki Akiyama, Yoshichika Anami, Masahiko Aosaki, Teruhiko Aoyagi, Rika Araki, Atsuko Ashiba, Keita Atou, Kojiro Awano, Nobuyoshi Azuma, Akihiro Azuma, Hideaki Bujo, Keiji Chida, Haruhiko Date, Toshiyuki Degawa, Kenichi Doniwa, Kenji Ebihara, Genshi Egusa, Yutaka Eki, Masamitsu Endo, Tsuyoshi Enomoto, Takashi Fujii, Hitoshi Fujimori, Yoshihisa Fujimoto, Kazuteru Fujimoto, Harutoshi Fujimura, Nobuaki Fujio, Motohiro Fujita, Toshiyuki Fujiwara, Atsushi Fukuda, Yoshiharu Fukuda, Ryuzo Fukunaga, Takatoshi Furuya, Shigeru Fuse, Takahisa Fuse, Jun Goto, Katsumasa Goto, Rikuzo Hamada, Tomio Hamada, Shin Hamamoto, Tadashi Hanabusa, Toshiaki Hanafusa, Nobuo Handa, Kazuhiro Hara, Yoshiaki Harada, Seiichi Haruta, Toshikazu Hashizume, Akira Hattori, Masamichi Hayashi, Yasuo Hayashi, Kazuyuki Hida, Kiichiro Higahi, Susumu Higaki, Yoshihisa Higashi, Masafumi Higashidate, Tetsuya Hiramoto, Koji Hirano, Kenichi Hirata, Katsuhiko Hiratani, Osamu Hirono, Atsushi Hirotani, Chiro Hisatome, Hidetoshi Honjo, Jin Hoshino, Tsutomu Hosoi, Naohisa Hosomi, Setsuro Ibayashi, Toshio Igaki, Tatsuyuki Iijima, Kiichiro Ikuni, Hiroshi Ikenouchi, Katsuji Imai, Kenji Imai, Takeo Imai, Shigehiro Imamura, Tetsuya Inatsu, Isao Inoue, Ikuo Inoue, Shun Ishibashi, Toshiyuki Ishibashi, Kazufumi Ishida, Shiro Ishida, Naoki Ishige, Masayuki Ishihara, Hisamitsu Ishihara, Yoshiyuki Ishii, Yasuaki Ishimaru, Hiroshige Itakura, Tatsuro Ito, Tatsuya Ito, Norio Iwaki, Masahiro Iwamoto, Tetsu Iwao, Takashi Iwase, Yuichi Izumi, Yosuke Jinnouchi, Hideto Joki, Noboru Kagawa, Hiroshi Kaieda, Takashi Kajikawa, Tatsushi Kamiya, Haruo Kamiya, Kotaro Kaneko, Yoshifumi Kanemaru, Atsunori Kashiwagi, Hitoshi Kato, Kenichi Kato, Hiroshi Katsume, Toshihiro Kawabata, Tadashi Kawaguchi, Kazuya Kawahara, Toshiharu Kawamoto, Yasuo Kida, Mikihiro Kihara, Takashi Kimura, Hironori Kimura, Atsushi Kinoshita, Tetsuya Kitagawa, Kazuo Kitagawa, Kazuyuki Kitamura, Hirokazu Kitamura, Tomoki Kitano, Hiroaki Kitaoka, Kyoko Kobayashi, Yasutaka Kobayashi, Hisashi Kobayashi, Yoshio Kobayashi, Masayoshi Kobayashi, Nobuo Kohara, Junko Koide, Junji Koizumi, Hiroshi Komachi, Hidehiko Konno, Yukihiro Koretsune, Tatsuo Koriyama, Seiichi Koseki, Satoshi Kotori, Kazunori Koyama, Michiya Kubo, Masazumi Kume, Masanari Kunimoto, Makoto Kunisaki, Ryuji Kunitomo, Yukio Kuniyoshi, Keiichi Kuroki, Masafumi Kuzuya, Masahiro Makino,

Yasuhiro Manabe, Katsuya Maruyama, Taro Maruyama, Motoko Masaki, Ryoichi Masuda, Masahisa Masuda, Susumu Matsubara, Junichi Matsubara, Masanobu Matsuda, Makoto Matsumura, Takeshi Matsuo, Tatsuru Matsuo, Teruhiko Matsushima, Yoshifusa Matsuura, Hiroyuki Matsuyama, Hajime Memezawa, Shinsuke Mii, Kunihiko Mitsuo, Hironobu Miyai, Yosuke Miyakawa, Susumu Miyamoto, Kazuo Miyatani, Yoshihiro Miyazaki, Yukihito Miyazawa, Hiroshi Mochizuki, Shin-Ichi Momomura, Yutaka Mori, Hisao Mori, Noriyasu Mori, Keisuke Morimoto, Ichiro Morita, Hiroshi Moriyama, Katsuhiko Motokawa, Tomoyuki Mukai, Makoto Murahashi, Satoshi Mura, Tsutomu Nagamitsu, Takehiko Nagao, Kazuya Nagata, Yasuhiko Nakada, Tomoko Nakagami, Joji Nakagawara, Kenichi Nakahara, Taku Nakajima, Yasuhiro Nakamura, Toru Nakamura, Yoshiki Nakamura, Yukio Nakamura, Takashi Nakamura, Masio Nakamura, Masaichi Nakamura, Hiroshi Nakane, Tatsuaki Nakato, Masao Nakatsuka, Seiichi Nakayama, Tsuyoshi Nakazato, Kishio Nanjo, Manabu Narimiya, Teruhiko Negishi, Toyoharu Nemoto, Mitsuro Niinomi, Kazuhiko Nishigaki, Hideo Nishikawa, Hideo Nishimura, Masao Nitta, Masahiro Nitta, Koichi Noda, Hiroshi Noda, Koji Noma, Haichiro Obata, Yoshiki Ochi, Toya Ochi, Yuji Ogawa, Takuo Ogawa, Akira Ogawa, Atsushi Ogo, Shinya Ohagi, Yoshifumi Oishi, Kaiyo Oiwa, Masataka Ojira, Kazunori Okada, Kenji Okada, Motoi Okada, Yasushi Okada, Masaya Okamoto, Yukiharu Okamoto, Shinya Okamoto, Masamichi Okubo, Satoshi Okuda, Tomoyuki Onishi, Naomi Ono, Tatsuyuki Onodera, Toshihiro Onohara, Koji Osumi, Takashi Ota, Masakatsu Otani, Nozomu Otani, Haruo Ozaki, Hideki Ozawa, Hiroshige Sairenji, Kenichi Sakai, Kikuo Sakai, Susumu Sakamoto, Ryuichi Sano, Akira Sato, Hiroshi Sato, Jo Sato, Koichi Sato, Ryoji Sato, Shoji Sato, Norio Sawamura, Kazuhiko Segawa, Takao Seki, Teisaburo Sekiya, Takayoshi Senda, Yoichi Shibasaki, Mikio Shida, Toshiaki Shigeyama, Norihiko Shiiya, Ichiro Shimada, Shoji Shindo, Kiyohito Shinno, Isanori Shinohara, Uichiro Shintani, Teruo Shiraki, Kazutaka Siomi, Makoto Sonobe, Katsunori Sugisaki, Hiroaki Sugiyama, Naoyuki Suto, Tomoya Suwa, Kazuhiko Suyama, Shin Suzuki, Masahiro Suzuki, Seiji Suzuki, Michiyasu Suzuki, Akifumi Suzuki, Masao Suzuki, Atsushi Tabuchi, Masami Tada, Naoko Tadakoro, Shuichi Taguchi, Soichi Taguchi, Yuji Tajiri, Tetsuya Takahashi, Toshihiro Takada, Yasuo Takeda, Manabu Takei, Naoki Takeichi, Hidehiro Takekawa, Yasunori Takemoto, Masamichi Takenaka, Toshiharu Takeuchi, Noriyuki Takeyasu, Motohiro Takita, Shunya Takizawa, Norio Tanahashi, Kimitaka Tanaka, Katsuhiko Tanaka, Satoshi Taniguchi, Toshihiro Tanzawa, Kazuhiko Tashima, Hirokazu Tashiro, Yoshihisa Tatsuo, Koji Tenda, Tamio Teramoto, Muneshige Tobita, Ryohei Todo, Ryuji Tominaga, Makoto Tomimaga, Atsufumi Tomohiro, Hirotaka Toshimori, Toshio Tsukubara, Takuya Tsuchihashi, Tetsuya Tsukahara, Kengo Tsukahara, Hiroshi Tsutsui, Naomichi Uchida, Hirokazu Ueda, Daishuke Uematsu, Hiroshi Uenohara, Makoto Ujihara, Takuya Umemoto, Masaaki Uno, Masaharu Urakaze, Yoshifumi Wada, Yukio Wakuta, Kazunori Wasada, Kiyoshi Watanabe, Tsuyoshi Watanabe, Takao Watarai, Toshiyuki Yabe, Zenu Yamada, Kenichi Yamada, Atsuo Yamada, Takeshi Yamada, Tetsuhiro Yamada, Hajime Yamagata, Tatsuyuki Yamaguchi, Kazuhiko Yamaguchi, Kazuo Yamaguchi, Shuhei Yamaguchi, Masahiro Yamamoto, Yasumasa Yamamoto, Hiroshi Yamanari, Kanji Yamane, Midori Yamano, Masahiro Yamasaki, Kenji Yamasaki, Katsuhiko Yamashita, Masafumi Yamashita, Iwao Yamashita, Kazumasa Yamatani, Yoshimitsu Yamazaki, Kaoru Yanagihara, Takumi Yasugi, Shozo Yasuoka, Hidehiro Yokochi, Norihiko Yokomori, Hiromitsu Yokota, Hitoshi Yokota, Naoto Yokota, Noboru Yokota, Toru Yokotani, Hiroyuki Yokoyama, Shigeru Yokoyama, Kazuya Yonezawa, Yoshihiro Yonezawa, Minako Yoshida, Masaki Yoshikawa, Koichi Yoshimura, Rikiya Yoshimura, Kimihiko Yoshimura, Shinichi Yoshimura, Kenichi Yoshioka, Narihito Yoshioka, Toshihiro Yudodo.

**Kingdom of Saudi Arabia:** Hussein Algahtani, Ashraf Hammouda, Waleed Khoja, Mostafa Abdel Ghany, Abdul Aziz Al Zamzami, Mohammed Ali Ali, Mostafa Ali Ahmed Alshamiri, Saeed Bohlega, Fayed El Shaer, Yousif Elmaleeh, Ibrahim Wasfy Gamal, Abdulhalim Kinsara, Mohammad Kurdi, Ahmed Mabrouk, Asif Malik, Hassan Raslan, Ashraf Shaaban, Hesham Taha, Radwan Zaidan.

**Korea:** Tae-Hoon Ahn, Sei Hyun Baik, In-Ho Chae, Ki Hyun Cho, Woong Hwan Choi, Yong Kil Choi, Kyung-Choon Chung, Ji Hoe Heo, Yangsoo Jang, Myung Ho Jeong, Dae Soo Jung, Heung-Sun Kang, Sunwoo Kim, Jong Sung Kim, Kyung-Soo Kim, Sung Kook Kim, Yong Ki Kim, Kee-Sik Kim, Dae Hie Lee, Kwang Ho Lee, Kwang-Soo Lee, Byung-Chul Lee, Inkyu Lee, Kyong Soo Park, Jeong Euy Park, Seong-Wook Park, Sung Woo Park, Chong-Yun Rhim, Ki-Bae Seung, Ho-Young Son, Jeong-Taek Woo, Sang-Doe Yi, Byung-Woo Yoon.

**Lebanon:** Hassan Abdallah, Joe Abi Raad, Grace Abi Rizk, Michel Abu Salbi, Khalil Ashkar, Farida Atallah, Pierre Awwad, Elie Chammas, Mostafa El Nakib, Kamel Ezzeddine, Adel Ghaddar, Beatrice Khater, Salem Maaliki, Malek Makarem, Michel Matar, Hanna Mattar, Riachi Mounir, Umayya Muhsarrafi, Claudine Nasr, Naji Riachi, Mounzer Saleh, Elie Stephan, Georges Tabet.

**Lithuania:** Nijole Bodindorfiene, Vytautas Docka, Laima Jankauskiene, Jurate Kojeliene, Milda Kovaite, Zaneta Petrulioniene, Ignas Tamosuitis, Birute Terbetiene, Danute Zaronskiene.

**Malaysia:** Raiha Abdul Kahar Abd Ghapar, Nah Abdul Khalid, Hjh Aziah Ahmad Mahayiddin, Tun Fizi Ambrose, Choon Kiat Ang, Zainal Ariffin Azizi, Raymond Azman Ali, Hamidon Basri, Wei Ling Chan, Siew Pheng Chan, Sau Kong Chang, Kok Han Chee, Yook Chin Chia, Yoon Sin Chong, Choon Hooi Choong, Santhi Datuk Puvanarajah, Yin Khet Fung, Eng Leon Goh, Hanif Hussein, Omar Ismail, Zulkeflee Ismail, Shaiful Bahari Ismail, Naimaton Ismail, Nor Azmi Kamaruddin, Norshinah Kamarudin, Balachandran Kandasamy, Soon Khai Lee, Yew Pung Leong, Houg Bang Liew, Chee Khoon Liew, Phanindranath Mahadasa, Choon Soon Mak, Julia Shahnaz Merican, Masni Mohamad, Chirk Jenn Ng, Hasral Noor Hasni, Ti Ong Kiam Ong, David Kwang Leng Quek, Vijayasingam Rajasingam, Kui Hian Sim, Ramesh Singh Veriah, Jeyaindran Sinnadurai, Kay Sin Tan, Lian Kim Tee, Soon Wee Tiang, Wan Bebakar Wan Mohamad, Zurkarnai Yusuf.

**Mexico:** Arturo Abundes Velasco, Geronimo Aguayo, Marco Antonio Alcocer Gamba, Graciela Alexanderson, Melchor Alpizar, Luis Enrique Amaya, Antonio Arauz, Armando Astorga, Jose Ramon Azpiri, Fernando Barinagarrementeria, Enrique Bernal Esbrada, Hector Manuel Briseno Ramirez, Cesar Calvo, Carlos Cauto, Hector Colorado, Jorge Cortes, Jorge Cossio, Manuel Odin De Los Rios Ibarra, Rodrigo De Zatarain, Carlos Diaz, Luis Eng, Jesus Esparragoza, Luis Espinosa Sierra, Carlos Espinoza, Pedro Fernandez Bonetti, Elias Garcia Cantu, Rodrigo Garcia Martinez, Alejandro Garza Guerra, Felipe De Jesus Gonzalez Camid, Francisco Guerrero Pasquerra, Ismael Hernandez, Andrei Kostine, Jose Luis Leiva, Leonardo Llamas-Lopez, Berenice Lopez, Julio Lopez Cuellar, Mauricio Lopez Meneses, Antonio Marcos, Sergio Najar Lopez, Jacobo Nettel, Fernando Ortiz Galvan, Rogelio Peralta, Juan Carlos Perez Garcia, Alejandra Ranero, Ricardo Rangel-Guerra, Joel Rodriguez, Idefonso Rodriguez Leyva, Jose Alberto Rojas, Aldo Romero, Gustavo Rubio, Jose Luis Ruiz, Alberto Sagastegui, Oscar Talamas, Monica Tapia, Jose Luis Antonio Toriz Melchor, Artemio Uribe, Jorge Vazquez, Jose Antonio Velasco, Erich Carlos Velasco Ortega, Raul Gerardo Velasco Sanchez, Jorge Villarreal.

**the Netherlands:** Wouter Barendregt, Jacob Buth, John Cheng, Anita Dall'Agata, Jeroen De Haan, Jaap Deckers, Jan Driesen, Zoran Erjavec, Albert Funke Kupper, Gwan Ho, Josephus Jutte, Koos Keizer, Jan Koning, Steef Kranendonk, Arno Oomen, Evert Sanders, Hans Sie, Niek Valk, Ben van Brussel, Marc van Dale, Eric van de Pavoordt, Rob van der Heijden, Laura van Dortmont, Jan van Iersel, Hero van Urk, Wim Verhagen, Adrie Withagen.

**Philippines:** Elizabeth Aguilar, Maria Ellen Grace Alferos, Maria Grace Ang, Veeda Michelle Anlacan, Maria Antonette Lourdes Aportadera, Abdias Aquino, Celine Aquino, Joel Ernest Araniego, Alberto Atilano, Fe Bacsal, Yul Balleza, Benny Barbas, Roy Joseph

Barcinas, Noel Belonguel, Jenny Beltran, Deborah Bernardo, Florenz Eubil Bilocura, Ester Bitanga, Amelita Brillantes, Leonor Cabral-Lim, Emerito Calderon, Warner Camarao, Maria Lourdes Canto, Raymond Jude Chango, Carlos Chua, Marietta Crisostomo, Joven Cuanang, Edna Cusay, Rex Decolongon, Manuel Del Moro, Erwin Del Rosario, Eduardo de los Reyes, Alejandro Diaz, Carissa Paz Diokino, Jane Doctora, Marcelito Durante, Del fin Encarnacion, Roy Entienza, Cesar Estalilla, Renato Evangelista, Erman Fandialan, Carmelita Fernandez, Roy Ferrer, Francisco Fuentes, Marie Simonette Ganzon, Florimond Garcia, Ruby Go, Manolete Guerrero, Lerrie Gutierrez, Alina Fatima Hojilla, Ranulfo Javelosa, Sjoberg Kho, Rogelio Libarnes, Marcelo Lim, Aileen Cynthia Llara, Johnny Lokin, Marilou Maglana, Francisco Maleza, Elma Maranon, Maria Conception Marcelo, Apistar Matias, Clarissa Mendoza, Rommel Montes, Jose Navarro, Reynaldo Neri, Orlino Pacioles, Patricio Palmes, Joel Paz, Rene Punsalan, Felix Eduardo Punzalan, Francis Marie Purino, Maria Lina Renales, Eugenio Reyes, Clara Rivera, Godfrey Robeniol, Raymond Rosales, Reynaldo Rosales, Romulo Rommel Rosita, Diana Jean Roxas, Artemio Roxas, Elson Sedilla, Johnny Shia, Edgar Tan, Aurora Tanzo, Dennis James Torres, Ramoncito Tria, Wilson Tulmo, Tommy Ty Willing, Luciene Lourdes Villacin.

**Portugal:** Luis Bimbo, Rui Duarte, Augusto Ferreira, Jorge Ferreira, Correia Junior, Filipe Macedo, Rui Medon, Joao Morais, Duarte Noronha, Jose Osorio, Carlos Perdigo, Paulo Pessanha De Andrade, Jorge Puig, Elisabete Rodrigues, Jose Sampaio, Manuel Viana Costa, Edgar Wellenkamp.

**Romania:** Valeria Carmen Albu, Daniela Cristina Anghel, Florina-Anca Antochi, Eduard Apetrei, Marina Catalina Arsenescu, Valeria Gloria Badiu, Ovidiu Alexandru Bajenaru, Rodica Ioana Balasa, Viorela Bangau, Constanta Banica, Carmen Barbulescu, Gabriela Bicescu, Elena Bobescu, Gabriel Boeru, Ruxandra Stefana Bogdan, Valentin Bohotin, Adrian Constantin Bucsa, Mihaela Bustan, Adrian Catalin Buzea, Ana-Varvara Campeanu, Radu Capalneau, Andrei Carp, Ovidiu Chioncel, Cristian Chiriac, Ruxanda-Dana Chirileanu, Mircea Cinteza, Aurora Constantinescu, Elena Constantinescu, Elvira Craiu, Carmen Cristea, Roxana Cruce, Dan Iulian Cucureanu, Ioana Cristina Daha, Anca Dan, Gheorghe-Andrei Dan, Roxana-Oana Darabont, Dan Deleanu, Doina Ruxandra Dimulescu, Cristian Diana, Mihail Diniesch, Maria Dorobantu, Andreea Dragulescu, Stefan Iosif Dragulescu, Bogdan Dumitriu, Amalia Ene, Cristian Falup-Pecurariu, Teodor Stefan Fischer, Angela Mirela Gavenea, Susana Geleriu, George Georgescu, Ioan Teodor Gheorghe, Leonida Gherasim, Ioana-Adriana Ghiorguiu, Carmen Ginghina, Alina Giuca, Ioan Laurentiu Gutiu, Anca Hancu, Diana Nicoleta Hodorog, Bogdan Ignat, Adina Ionac, Dan-Dominic Ionescu, Florina Violeta Isai, Octavian Istratoaie, Dragos Catalin Jianu, Emilia Lungu, Cezar Macarie, Liviu Macovei, Ioan Constantin Marginean, Mihaela Marian, Doina Carmen Marinescu, Liviu Matcau, Costel Matei, Daniela Maria Maximov, Constantin Miliaru, Ioan-Dan Minea, Adriana Mitre, Mircea Moldovan, Ecaterina Moraru, Carmen Manuela Muresan, Bogdan Mut-Vitu, Gabriela Monica Niculescu, Maria Mihaela Opris, Cristina-Aura Panea, Ion Pascu, Daniela Mariana Patru, Marcel Peraanu, Lacramioara Perju-Dumbrava, Florin Petria, Maxim Petrica, Sanda Hortensia Petrutiu, Viorel Poalelungi, Mihaela-Ruxandra Popescu, Andreea-Catarina Popescu, Damian Popescu, Dinu Cristian Popescu, Maria-Rodica Prodan, Tudor Protopopescu, Mariana Radoi, Maria Rotaru, Mihaela Rugina, Horatiu Rus, Anca Paraschiva Rusu, Radu Andy Sascau, Marinela Serban, Adela Serban, Costel-Sorin Stamate, Delia Maria Stanca, Liana Stanescu, Cristian Statescu, Felicia Stefanache, Cristina Mihaela Tanaseanu, Marina Ticmeanu, Diana Tint, Cristina Tirziu, Cristina Tiu, Ildiko Toldisan, Luminita Toma, Nicoleta Andreea Tovirnac, Simona Octaviana Treidler, Luminita Tudor, Valerica Tudorica, Daniela Turdeanu, Sorin Tuta, Vitalie Vacaras, Ioana Varga, Marin Vasile, Radu-Gabriel Vatasescu, Crisanda Vilciu, Dragos Vinereanu, Marius Marcian Vintila, Gabriela Vulpe, Cornelia Zaharia, Simona Zaharia, Lucian Zarma.

**Russian Federation:** Fail Ageev, Dariga Akasheva, Gregory Aroutiounov, Boris Bart, Boris Bondarenko, Vladimir Chernyavski, Irina Demidova, Oxana Drapkina, Natalia Egorova, Anatoly Evdokimov, Igor Fomin, Marina Freydina, Albert Galyavich, Maria Glezer, Nikolai Gratsiansky, Yury Grinstein, Nikolai Horev, Alla Ivleva, Michael Karpenko, Yuri Karpov, Ludmila Katelnitskaya, Perch Kazantchian, Roman Kholkhlov, Oleg Khrustalev, Andrew Kiritchenko, Zhanna Kobalava, Irina Kolina, Andrey Komarov, Lioudmila Korenko, Valery Koshkin, Sergey Kotov, Natalya Koziolova, Ekaterina Kropacheva, Valery Kukharчук, Pavel Laguta, Petr Ledebev, Alexander Lipchenko, Veronika Lopukhova, Valentin Markov, Anatoly Martunov, Irina Mironova, Vladimir Naumov, David Nebieridze, Igor Novitsky, Iana Orlova, Nikolay Pavlov, Anatoly Pokrovsky, Victor Rapovka, Oleg Rodnenkov, Anastasiya Sankova, Sergei Shalaev, Igor Shaposhnik, Marina Shestakova, Vladimir Shmirev, Alexander Shpektor, Vladimir Shulman, Boris Sidorenko, Alexey Sizov, Andrey Skvortsov, Veronika Skvortsova, Ivan Sokolov, Mikhail Statsenko, Gennady Storozhakov, Leonid Stratchounski, Tatyana Sukhinina, Vitaly Sulimov, Nina Sysyova, Marine Tanashyan, Konstantine Tebloev, Victor Tutunov, Alexander Upnitsky, Natalya Yarokhno, Ludmila Yeliseyeva, Vladimir Zadionchenko, Alara Zakirova, Yekaterina Zharova.

**Singapore:** Poh Kit Ang, Sivathasan Cumaraswamy, Bernard Chan, Nang Fong Chan, Hui Meng Chang, Christopher Li Hsian Chen, Thomas Cherian, Kok Hoong Chia, Piang Ngok Chong, Sui Meng Chua, Pong Kuan Chua, Mark L. A. Da Costa, Deidra Anne De Silva, Binayak Deb, Mukund Doshi, Peter Eng, Robert Gan, Khee Hock Goh, King Hee Ho, Gunasegaran Kurugulasigamoney, Peng Chin Kek, Philip Siam Soon Koh, Adrian Thong Kiang Koh, Seng Long Koo, Chee Choong Koo, Chon Sham Lee, Tang Yin Lee, Stanley Liew, Ah Kiong Liew, Ing Haan Lim, Michael Lim, Chin Hock Lim, Su Chi Lim, Jayaram Lingamannaicker, Lip Ping Low, Suresh Mahtani, Koon Hou Mak, Sebastian Mathew, Richard Mong Hoo Ng, Ramani Narayanaswamy Venketasubramanian, Peter Teck Hwee Ng, Sarani Omar, Jason Pang, Raymond Chee Seong Seet, Vijay Sharma, Kim Bin Siah, Charles Siow, Lui Cheng Sng, Huay Cheem Tan, Ru San Tan, Melvin Tan, John Choon Heng Tan, Yong Teck Tan, Vincent Tan, Jam Chin Tay, Hock Luen Teoh, Hoo Ing Tong, Thean Seng Tong, Jane Tran, Albert Wee, Teck Wee Wong, Meng Cheong Wong.

**Spain:** Manuel Abeytua, Maria Dolores Adarriaga, Antonio Garrado, Eduardo Jesus Alias, Fatima Almagro, Guillermo Alonso, José Luis Alonso, Nelson Maria Alvarenga, Luis Javier Alvarez, Amparo Alvarez, Juan Andreu, Jose A. Anton, Juan Carlos Arias Castano, Ignacio Artigues, Emilio C. Baldo, Joaquin G. Bautista, M. Nieves Bellera, Juan Bello, Oscar Beloqui, Jose Maria Bermudez, Miguel Blanco, Juan Carlos Bohorquez, Alfonso Bolaños, Vicente Brossa, Jordi Bruguera, Antonio Cabarcos, Purificacion Cabelos, Marc Cairols, Carlos Calvo, Ignacio Camacho, Joaquin Canoves, Pere Carbonell, Maria Cruz Carreno, Ignacio Casado, Jose Ignacio Catalan, Paz Catalan, Aranzazu Caudevilla, Jose Cerda, Pilar Raquel Chamarro, Alfredo B. Charles, Berta Claramonte, Vicente E. Clement, Juan Colas, Pere Comas, Jesus Juan Corrochano, Carlos Culebras, Meliton Francisco Davila, Javier de Andres Novales, Maria del Pilar de Luis, Felix Diaz Perez, Ignacio Duran, Jose Antonio Egido, Jose-Bernardo Escribano, Juan Manuel Escudier, Antonio Espinosa, Raul Espinosa, Jose Ramon Fernandez, Ovidio Fernandez, Fabriciano Fernandez de la Cigonia, Marta Ferrero Ros, Antonio Flores, Rosa Maria Folgado, Francesc Formiga, Carlos Franco, Joaquin Franco, Evaristo Freire, Moises Galan, Jesus Galiana, Iluminada Garcia, Francisco Garcia, Juan Pedro Garcia, Bartolome Garcia, Gonzalo Garcia, Jose Maria Garcia, Fernando Garcia de Burgos, Bernardo Garcia de la Villa, Juan de Dios Garcia Diaz, Juan Carlos Garcia-Mongo, Daniel Eduardo Geffner, Ricardo Gesto, Juan Miguel Giron, Ignacio Goicolea, Fernando Gomez, Jorge Francisco Gomez Cerezo, Emilio Gonzalez, Carlos Gonzalez, Alonso Gonzalez, Maria Isabel Gonzalez, Manuel Gonzalez, Muel Gracia-Naya, Gabriel Gusi, Gabriela Guzman, Jose Sergio Hevia, Maria Luisa Hidalgo, Pedro Horcajo, Maria Ibanez, Ana Idoate, Miguel Idoate, Jaume Illa Gay, Maria Irurita, Javier Iser, Guillermo Izquierdo, Sergio Jansen, Catalina Jimenez, Blas Jimenez, M. Dolores Jimenez, Elisabet Juñca, Francisco Laynez,

Jose Manuel Ligerio, Jose Maria Lis, Secundino Llagostera, Carmen Lloret, Alfredo Llovet, Juan Carlos Lopez, Luis Lopez, Aquili no Lopez de la Osa, Pablo J. Lopez-Ibarra, Francisco Lozano, Maria De Los Reyes Luna, Jose Luis Macingirar, Juan Manuel Maraver, Jose Maria Marey, Jose Marin, Alejandro Martin, Juan Carlos Martin, Elvira Martin de la Torre, Alberto Martinez-Berganza, Manuel Martinez-Perez, Ramon Martos, Jaime Masjuan, Antonio Mateos, Vicente Medrano, Jordi Merce, Angel Merchante, Shaghim Mir Davood, Carlos Mirete, Felipe Molina, Jose-Manuel Molto, Marcelino-Jesus Montero, Manuel Montero, Marian Montero, Pedro Maria Montes, Francisco Jose Monzon, Mirem Morillas, Pedro Jose Morillas, Antonio Munnilla, Ricardo Nicolas, Pedro Niembro, Rosa Numancia, Enrique Nuño, Fernando Olaz, Nieves Oller, Juan Ortega, Javier Ortega, Ernest Orts, Ana Otero, Antonio Paules, Marco Antonio Paz, Jose Luis Peña, Jose Luis Perez, German Perez, Alfonso Perez Molino, Gonzalo Pia, Josefina Pinedo, Angel Plaza, Inmaculada Plaza, Juan Manuel Pons, Jose Carlos Pontes, Antonio Portolés, Francisco Poveda, Maria-Ignacia Prat, Enrique Puras, Josefa Rasel, Jose Tomas Real, Sandra Redondo, Miguel Angel Rico, Andreu Rius, Josep Maria Roca, Enrique Rodilla, Jose Angel Rodriguez, Melchor Angel Rodriguez, Javier Rodriguez, Angel Ciriaco Roldan, Antonio Romero, Jaime Roquer, Julia Roure, Tomas Rubio Vela, Jose Ignacio Ruiz, Mariano Ruiz, Joaquin Ruiz de Castroviejo, Martin Ruiz Ortiz, Oscar Saavedra, Jose Saban, Josep Sadurni, Luis Saez, Jose Antonio Saenz de Quevedo, Jesus Salas, Antonio Salvador, Jose Maria Sanchez, Pedro Sanchez, Sonia Santos, Julia Saura, Jesus M. Sedeno, Tomas Segura, Francisco Javier Serrano, Pedro Javier Serrano, Javier Solis, Cristina Soriano, Jose Francisco Sotillo, Ana Isabel Soto, Carmen Suarez, Mercedes Suarez, Luis Miguel Tamargo, Luis Teigell, Jose Maria Trejo, Jordi Trulla, David Tura, Miguel Urtasun, Eliseo Val, Mariano Valdes, Javier Vaque, Fernando Vaqueo, Luis Varona, Antonio Vazquez, Francisco Vega, Alfredo Velasco, Tomas Vicente, Juan Antonio Vidan, Blanca Vilaseca, Ricardo Vilchez, Irama Villar, Javier Viñas, Guido Volo, Manuel Jesus Zarauza.

**Switzerland:** Gilbert Abetel, Franco Ackermann, Nicola Alexander-David, Piero Andreoli, Michel Badan, Bruno Boillat, Hans-Juerg Bopp, Ruedi Bosshardt, Heinrich Budmiger, Reto Cadisch, Philippe Chapuis, Haw-Tzer Chen, Yves Collioud-Robert, Josy-Philippe Cornut, Jean-Pascal Croci, Philippe Delorme, Roberto Gianni Di Stefano, Urs Duerst, Dominique Durier, Urs Enggist-Ruesch, Marco Fauchini, Heinrich Ch Flueckiger-Keller, Antoinette Frangos, Felix Fust, Markus Gallati, Didier Genond, Alfred Gerber, Alberto Ghirlanda, Didier Giroud, Willy Gross, Christian Haeuptle, Philippe Haldy, Michael Hany, Elie Hecker, Christophe Henny, Markus Hug, Blaise Ingold, Gereon Jachertz, Olivier Jaques, Sébastien Jotterand, Urs Keller, Franz Kieliger, Aldo Kramis, Mariusz Kraszewski, Andreas Kuske, Martin Landolt, Markus Lanz, Thomas Limacher, Jean-Francois Luthi, Pierre-Andre Martin, Juerg Niesper, Karl Nuesch, Hanspeter Oechslin, Albert Pfaeffli, Alexander Pinzello, Michel Pithon, Michael Richter, Thomas Schneider, Hans-Rudolf Schwarzenbach, Philippe Staubli, Hans Stricker, Lou is Tjon -A-Meeuw, Pierluigi Togni, Enrico Tschurr, Paolo Tutta, Barbara Vogel Wigger, Irene Von Planta, Daniel Vuilleumier, Niklaus Waldis, Jean-Marc Wandeler, Yves-Marie Wasem, Josef Widler, Christian Widmer, Stephen Woolley, Bernhard Zauner, Andreas Zbrun.

**Taiwan:** Lung Chan, Chao-Shun Chan, Chi-Jen Chang, Hung Yu Chang, Chiung-Chih Chang, Ku-Chou Chang, Pan Chen Chang, Rei-Yeuh Chang, Jun-Yih Chang, I-Chung Chen, Chi-Li Chen, Yu-Wei Chen, Jia-Ren Chen, Chih-Wei Chen, Cheng-Yun Chen, Yung-Ping Chen, Tsang-Shan Chen, Wei-Hung Chen, Yu-Hung Chen, Zhii-Cherng Chen, Kuo-Chin Chen, Mei-Hsiu Chen, Tain-Junn Cheng, Chih-Hui Chin, Chiung-Zuan Chiung, Li-Ping Chou, I-Tseng Chu, Wen-Ting Chung, Chin Shih Fong, Chih-Ping Hsia, I-Chang Hsieh, Yuankai Hsieh, Jen-Che Hsieh, Ron-Bin Hsu, Ming-Chin Hsu, Chin-Fu Huang, Chin-Wei Huang, Yu-Yau Huang, Jiann-Shing Jeng, Chien-Chen Ko, Wen-Kai Kuo, Wen-Ter Lai, Chen-Chin Lee, Tsong-Hai Lee, Kuan-Hua Lee, Li-Ming Lien, Shinn-Kuang Lin, Ruey-Tay Lin, Tin-Kwang Lin, Kao-Chang Lin, Rue-Tsuan Liu, An-Bang Liu, Huey-Ming Lo, Dee Pei, Shan-Jin Ryu, Mao-Lin Sung, Sung-Chun Tang, Shiang Tang, Wen-Lung Tsao, Kwo-Chang Ueng, Tzung-Dau Wang, Shi-Yi Wang, Ko-Yi Wang, Cheng-Yu Wei, Ting-Yu (Dean) Wu, Jung-Chou Wu, Wen-Shiann Wu, Shang-Shan Yang, Shouu-Jeng Yeh, Chung-Hsin Yeh, Shih-Bin Yeh, Ping-Keung Yip, Bak Sau Yip.

**Thailand:** Yupin Benjasuratwong, Watana Boonsom, Wacin Buddhari, Pongamorn Bunnag, Nijasri Charnnarong Suwanwela, Adhisabandh Chulakadabba, Chaicharn Deerochana Wong, Suchat Hanchaiphilboolkol, Sopon Jirasiritham, Rungsrit Kanjanavanit, Weerayut Khositsakulchai, Songsak Kiatchoosakun, Pornchai Leelanipon, Nithi Mahanonda, Samart Nidhinandana, Sirichai Niramaxsakul, Sumana Nopparat, Arintaya Phrommintikul, Chumpol Piamsomboon, Pavit Pienvichit, Paisith Piriyawat, Niphon Poungrarin, Wilai Puavilai, Disya Ratanakorn, Tongprakob Siriwanij, Kajorn Suntrapiwat, Swangit Suraamornkul, Saranyou Suwanugsorn, Sompongse Suwanwalaikorn, Viroj Tokavanich, Damras Tresukosol, Gumpanart Veerakul, Apichati Vichayanrat, Visuit Vivekaphirat.

**Ukraine:** Kateryna Amosova, Svetlana Andriyevskaya, Igor Bereznyakov, Mykola Bezyuk, Olexandr Dyadyk, Georgiy Dzyak, Ludmila Dzyak, Boris Goloborodko, Nataliya Grytsay, Igor Kobza, Oleg Korkushko, Olena Koval, Volodymyr Kovalenko, Svetlana Kuznetsova, Tamara Mishchenko, Nataliya Mishchuk, Vasyl Netiazhenko, Alexandr Nikonenko, Vadim Nikonov, Alexander Parkhomenko, Tetyana Pertseva, Sergey Polyvoda, Yuriy Rodin, Anatoliy Rudenko, Victor Rudenko, Yuriy Rudyk, Oleg Sergeev, Yuriy Sirenko, Yevgeniya Svishchenko, Sergey Sychov, Victor Tashchuk, Igor Vakalyuk, Stepan Vynchuk, Vadim Vizir, Vladimir Volkov, Leonid Voronkov, Andriy Yagensky, Valentina Yavorskaya.

**United Arab Emirates:** Aboobaker Abdul Rahuman, Sherif Bakir, Nooshin Bazargani, Azzan Binbrek, Galal Eldin Elkilany, Jihad Inshasi, Deeb Maxwell Kayed, Christian Lange, Adel Wassef, Tayseer Zein Elabdin.

**United Kingdom:** Malcolm Addestone, Rajendra Agarwal, Richard Barker, Anthony Barnett, Balasubramaniam Baskaran, David Bowen-Jones, Andrew Brooks, James Ronald Courtney, Philip Cummin, Richard Donnelly, Michael Duckworth, Jeremy Dwight, Thomas Egerton, Ian Farker, James Ferguson, Ahmet Fuat, Tim Gietzen, Jonathan Hamling, John Hole, Shervanthi Homer Vaniasinkam, Ivor Hughes, Paul Husselbee, Martin James, George Kassianos, Martin Kent, Barbara King, James Kingsland, Michael Kirby, Robin Lalsarin, Richard Lawrence, Ping Siang Lee, Mary MacLeod, Gillian Manning, Ross Martin, Carol McKinnon, David Douglas McKeith, Dalpatram Mistry, Susan Morgan, Sarah Morgan, Michael Page, Basil Francis Penney, Stephen Rowlands, Jagtesh Sharma, Cliff Shearman, Lionel Sherman, Manish Singh, William Thorburn, David P. B. Watson, Alastair Watt, Robert Weir, Peter Sidney Wiggins.

**United States:** Coordinating Committee : Larry Brass, Marie Brown, John Cooke, Bruce Coull, Mark Creager, Michael Criqui, Greg Fonarow, William Golden, Philip Greenland, Michael Jaff, Pavel Levy, Pat McBride, Mary McDermott, Elizabeth Ofili, Charles Reasner, Ralph Sacco, Elijah Saunders, Jeffrey Saver, Peter Sheehan, Karl Watson.

**Investigators :** Rahat Abbas, Lisa Abbott, David Abdehou, Issa Abedmahmoud, David Abisalih, William Abraham, Kenneth Ackerman, John Addo, Angela Adelizzi, Satinder Aggarwal, Maher Agha, Thordur Agustsson, Bashiruddin Ahmad, Anwar Ahmad, Sheikh Ahmed, Dilawar Ajani, Fabricio Alarcon, Cesar Albarracin, Kim Albright, Cesar J. Aleman, Ruben Aleman, Jeffrey S. Alexander, Michael Alexander, Steven Alexander, Abdul Ali, Hussamaddin Al-Khadour, Deana Al-Khateeb, David Allan, Richard Allen, Ronald Alley, Michael D. Allison, Manohar Alloju, Barnett Alpert, Irfan Altafullah, Reynald Altma, Venkatreddy Alugubelli, Frank Alvarez, Hernando Alvarez, Sandra Alvarez, Gustavo Alza, Saleem Aman, Chimezie Amanambu, Salah Amer, Jatin Amin,

Kausmik Amin, Narendra, J. Amin, Yogeshcha Amin, Maged Amine, David Amos, David L. Anders, Charles P. Anderson, William Anderson, Peter B. Anderson, Bruce Andrea, Luis Anez, Satish Angra, Shamshad Anjum, Salwan Anton, Juan Apon te, Vincent Aquino, Dercy Aranador, Peter Arcuri, Abraham Areephanthu, Lisa Arian, David Arkin, Jodh Arora, Ansermo Arthur, William J. Artz Jr, Palaniapp Arumugham, Siva Arunasalam, Tanya Arvan, E. David Ascarelli, Ralph Ascher, Letterio Ascianto, Wail Asfour, Mohammed Asgar, Susan Ashley, Gerald Asin, Mansour Assar, Hatem Ataya, John Atkinson, Frank Attenello, Larry Atwood, Du carmel Augustin, Than Aung, Barry Austin, Howard Axe, Alexander Axelrod, George Aycock, Oluropo Ayeni, Bryce Ayers, Muhammad Azam, Nabil Azar, Harvey Azarva, Sueann Babb, Kevin Babin, Oswald Bacani, Umeshkuma Badami, Timothy S. Bailey, Paula Bailey-Walton, Gary Baiocchi, Donald Baird, James Baker, Ladan Bakhtari, Robert Bala, Gobivenka Balaji, James Baldys, Jose V. Ballesteros, Pratap Balusu, Chaim Banjo, Ahmad Banna, Tobia Barbato, Frederick Barber, Harris Barrett, Anthony Bartkowiak, Thomas Barkley, Sara Bartos, Basel Batarseh, Neera Bathija, Ali Bazzi, James L Beach, Thomas Beamer, Michael Beane, William C. Beck, Howard Becker, Richard Becker, Steven Becker, Teresa Becker, Gary Bedel, Harjaneet Bedi, Richard Beham, Steven Belt, J. William Benge, Dana Bennett, Charles Bennett, Nathan Bennett, Paul Benson, Michael Berard, Zoya Berenson, Richard E. Berger, Oran Berkenstock, Gregory Berland, Gary Berman, Yuri Bermudez, Seth Bernard, Jay Bernstein, John F. Berry, Robert Beville, Ravi Bhagwat, Adarsh Bhat, Harry S. Bhatia, Dinesh Bhatia, Anil Bhatia, Divyesh Bhatt, Jayantilal Bhimani, Paul Bicek, Sandy Bidner, Robert Bierman, Dan Bieser, John Biggers, Barbara Biggs, Smita Bijlani, Ilya Bilik, Alan Bilsky, Karla L. Birkholz, Ishak Bishara, Veita Bland, Benjamin Blank, Kenneth Blaze, Michael Bleiman, Scott Bleser, Daniel Blizzard, Ronald Blonder, Craig M. Bobson, Donald Bodemann, Stephen Bodemann, Timothy Boehm, Nancy Bohannon, Paul Boinay, Gregory Bojrab, Anu Bommareddi, William M. Bond, Dana Bonezzi, Jonathan Bornfreund, Joseph F. Bornheimer Jr, David T. Borowski, Robert Borrego III, Peter Bottar, Alix Bouchette, Craig Boudreaux, Max Boune, Jean-Claude Bourque, Robert L. Bowling, Cherry Brandstater, Gary Breen, Ray Breitenbach, Arnold J. Brender, Peter Bressler, Donald Briede, Paul Benson, Michael Berard, Zoya Berenson, Richard E. Berger, Harry Brodie, Michael Brodowski, Neil Brodsky, Barry Bronstein, George A. Brooks, Carman Brooks, Gilbert T. Brovar, James Brown, Kevin Brown, Gary Brunkow, John E. Brunner, Michael Buben, Hector Buch, Robert Buckingham, Ernesto Buencamino, Ronald Buening, Angela Bully, Richard Bultman, Noor Bunney, Brian Buoscio, John Burch, Max Burger, John Burkard, James Bush, Richard Butcher, Susan Butler-Sumner, Robert J. Buynak, Joseph G. Cacchione, Alvin Cacho, Daniel Cadigan, David Cahn, Robert Caifano, Roy Caivano, Beverly Calkins, Daniel Cameron, Sumner Camisa, Deborah Camiscoli, Jeanne Campbell, David R. Campbell, Robert Campbell, Martin Caperton, James P. Capo Jr, Angelo Cappiello, Anthony Caputo, Richard A. Caputo, John Caras, James E. Carley, Leon or Carluen, David Carmouche, Richard Caro, Kent Carpenter, Kyle Carter, Glenn Carter, Steven Carver, Terrance Castor, Samuel D. Caughron, George Cavanaugh, Patricia Caverro, Lee Celio, Robert Cevasco, Vijay Chadha, Jyoti Chakravarty, Donna Chambers, Becky L. Chandler, Michel Chapnick, Arthur Charmatz, Maria Charron, Michael Chaskes, Ignacio Chaves, Opkar Chawla, Kuan-Cheng Chen, Chung-Kwang Chen, Eric Cheng, Tien Cheng, Yuri Cheryn, Indira Chervu, Thomas Chesar, Salomon Chesoni, David Chess, Peter Chhabria, Michael Chidester, Anthony Chieffalo, Oscar L. Chien, Danny Chin, Angel o Chini ni, Donald Chisholm, Olathia Chisolm, Ronald H. Chochinov, Suk Choi, Myunghae Choi, Jatinder Chopra, Nakchin Chung, Robert Ciemiega, Michael Cirilli, Ronald Ciubotaru, Frank A. Civitarese, Louis A. Civitarese, Daniel Clark, Dennis Clark, William Coburn, Steven L. Cochran, J. Louis Cohen, Loren Cohen, Shari Cohen, Susan Colbert-Threats, Ronald Cole, Gary Coleman, Scott L. Coleman, Maha Colas, James Comazzi, Barry Conlan, Michael Conrad, Sean Conroy, Sebastian Conti, Richard Cook, Nelson Cook, J. Paul Cook, Joseph Cook IV, David L. Cooley, Daniel Cooper, Michael Cooperman, Jerry Cope, Danny Corales, Bernard Corbett III, Edward Coreil, George Cornett, David Cossman, Susan L. Courtnage, Louis Cox, William Cox, Michael Cox, Yvette Crabtree, Joh netta M. Craig, John Crider, James Crider, Edgardo Crisostomo, Michael Cromer, Jon Cronin, Janna Crosnoe, Irene L. Cueto, Frank E. Cummins, Chackumkal Cyriac, Rebecca Dailey, Samuel J. Daisley, Gloria Damien, Keith Damsker, Bhuvanves Dandapani, Tze-Yu Dang, Christine Darwin, Suresh Dasani, Leonard Dimmitt, Lisa Silva, Robert Dausch, Anita N. Dave, Kamlesh Dave, Roger Davidson, Gregg Davis, Kenneth Davis, Pamela Davis, Paul Davis, Regina Davis, Sakina Davis, William Davis, Hursie Davis Sullivan, Thomas M. Dawes, Mark Dawson, Dominador L. Dayon Jr, Praxedes M. Dayon Jr, Nirmal K. De, Armando de Fera, Mario de Meireles, Jose de Souza, Don Dearmitt, Susan Debin, Gordon Decker, Ernest Defazio, Ross del Fierro, Bernardo Delaguardia, Eli ezer R. Deleon, Christine Delgaizo, Salvador Delrosario, Joseph Deluca, John A. Demopolos, Michael Dempsey, Marvin Den, Michael Denker, Paul Denker, Kevin Denlinger, Garth Denyer, Shivinder S. Deol, Gustavo Depetris, Pankaj R. Desai, Jayaprakash Desai, Anthony Detulio, Denise Deveranez, Gary Devoss, Chrisee Dharma, Ricardo di Sarli, Richard Diamond, Steven Diamond, Sam Diasti, Franco Diaz, Martiza di Diaz, Susan Dickson, James Diethelm, Michael Dietz, Patricia Disharoon, John Dixon, Michael Dobish, Christopher Dobrose, Douglas Doctor, Heman B. Dodani, Larry Doehring, Frederick Doerfler, Paul Donnan, James Donovan, Larry Doroshov, John Dorsey, Natalie Doyle, Gerald Dreslinski, Netley D'Souza, Pamela Dugano-Daphnis, Narindar M. Duggal, Jennifer Dunbar, Katherine Dunleavy, Richard M. Dupree, Antonio Duazo, Theodore Eastburn, Andrew M. Ecker, Joseph Eckert, James Edwards, Troy Edwards, Richard Egan, Alan Egelman, Christopher Ehly, Joseph Eickmeyer Jr, Zamir Eidelman, Bruce M. Eisenberg, Gilbert Eisner, Richard A. Elias, Arthur Elkind, Russell Emerson, Jay Enders, Michael Englund, Richard Enns, Julio A. Enriquez, Thomas Epperson, Gurol Erbay, Kent Erickson, James Eisenmenger, Oliver Eshenaur, William Espinoza, Nor deli Estronza, Manoharan W. Eustace, Bryan Evans, Patricia Fahey, Fayaz Faiz, Alik Farber, Hussam Farhoud, Joseph Farmer, Mark Faron, Debra Fast, Stacey Fazenbaker, G. Thomas Fazio, Kathleen Fearon, Daniel P. Featherston, Michael Fedak, Hailing Fei, Brian Feingold, Greg Feinsinger, Bryan Feldman, Francis M. Felice, Afonso Ferreira, Dennis P. Fielding, Carolyn Fields, Ramon Figueroa, Alan Fine, Brian First, Jerome Fischer, Joel Fischgrund, Richard Fishman, Eugene Fishman, David B. Fittingoff, Kelleen Fitzgerald, Mark Fitzgerald, David Fitz-Patrick, Patrick Flamion, Thomas Flanagan, Susan Flanzman, Jerrold Flatt, Leslie R. Fleischer, Diane Flershem, Adolph Flowers, Pau K. Fong, Robert Foster, Dana Fouchi, Donald Fowler, David Fox, John Fox, Carol Frank, George Frank, Ronald Frank, Matthew Frankel, Michael Franklin, Elliott Franks, Jerome Franz, Daniel Freberg, Jeffery M. Freesemann, Donald Frein, John B. Freitas, Greg French, Craig Freyer, Jack Friedel, Richard Friedlander, Edward Friedman, Linda Freilich, Samuel Frumkin, David Fuentes, Joseph Fuller, Frank Fusco, Denise Fuson, Manu Gadani, Pravin Gadani, Nitin Gaikwad, Marc Gaines, Anthony Gaither, Peter Galvan, Melissa Gamponia, Arvind Gandhi, Jyoti Gandhi, Bhupendra Gandhi, Ramon M. Garcia-Septien, Jeffrey Garb, Shyrelle Gardner, David Garfias, Marcus Garfield, Ram Garg, James Garner, David Garretson, David Garrett, David Garza, Irvin J. Gastman, Simon Gebara, Lakhabhai Gedia, James Gehant, Steven Geller, Willis Gelston, Mikhail Gendel, Shawn Gentry, William George, Matthew George, Robert Geronemus, Luis Gerstenmeier, Donald Giant, James E. Gibbs, Francisco Gil, David L. Gilbertson, Michael Gilinsky, Satpreet Gill, Roy Gillick, David Gilliam, Eugene Gillman, Mary Gindi, George Gindi, Linda A. Glaser, James Glass, Elyse Glazer, Boris Gliner, Jan Glowacki, Eugene Go, James Goetz, Ramnik Gokani, Burton H. Goldberg, Ronald Goldberg, Joshua Goldman, Stephen Goldner, Daniel Goldsmith, Arnold Goldstein, Francis Goldstein, Robert Goldstein, William A. Gonzales, Julian Gonzales, Miguel Gonzalez, Diane Goodale, Peter Goodfield, Daniel Goodman, Anil Gosalia, John Gosling, Atul Goswami, Daniel Gottlieb, Otto Goyco, Neil Grabensetter, James Grady, Kurt Graves, Victoria Greblya, Randall

Green, Robert Green, David Greenberg, Martin Greenfield, Robert M. Greenfield, Steven B. Greenman, Mitchell Greenspan, Paul Griffel, Daniel Griffin, Corinne Griffith, Howard Grill, William S. Gross, Teresita Guanzon, Michael Guice, Carolyn Guidot, Rohit Gulati, Franklin Guneratne, Suresh Gupta, Michael Hack, Everold Haffizulla, Farzanna Haffizulla, Jason Haffizulla, Joel Hagedorn, Jeffrey Haggenjos, Steven Hall, Roger Hallgren, Betty Halpern, Alan Hamilton, Maxine Hamilton, Todd Hammond, Jewell Hamner, Glenn Hamroff, Min-Yen Han, Forrest Hanke, Beth Hanrahan, Eric Hansen, Richard Hansen, Charles Hanshaw, Mike Harless, Michael D. Harris, Nita Harris, Roy W. Harris, Stephen Harrison, Matthew E. Hart, Paul Hartley, Daniel Haspert, Joseph Hassan, Irfan W. Hassen, Roger Hatharasinghe, Tabassum Hatimi, Martin Hautpschein, George C. Hawrot, Richard Hays, George Gilbert Head, Luis Heffess, Ole Heggeness, Jeffrey Hein, Philip Heinegg, Maryam Hekmat, Richard Hellman, Hal Hemme, Stephen Henderson, Gregory Henes, Mario Henriquez, David Henry, Aravind Herle, Paul Hermany, Adan Hernandez, Carlos R. Herrera, Moses Herrera, Robert Herrera, Stephen Herrington, Jeffrey Hershkowitz, Phillip Hertzman, Peter Herz, Steve Hiland, Stephen Hillis, Daniel Hilton, Edward Himot, Aref Hindawi, Ralph Hines, Susan Hirtz, David L. Hitz, George Hnatiuk, Marion Ho, Vincent Ho, Henry Hofbauer, Barbara Hoffman, Daniel Hoffman, Mark Hoffman, Joseph Holik, David Hollis, Kenneth Hong, Laura Hong, Peter Honig, Michael Hood, Bryan Hooker, David Hooks, Arnold Hopland, Stanley Horowitz, John House, Jerome Howard, Warren Hoyt, Ewa Hozakowska, Jui-Chinh Hsu, Yiling Huang, Daniel Hubbard, Yolanda Huet Vaughn, Michael Hugar, Garland Hughes, In Huh, Terrill Hulson, Richard Huntley, Joan Hurlock, Nizar Hussain, Amanda Huver, Anthony Iannamorelli, Syed Imam, Gregorio Imperial, Young In, Fred Ingram, Carlos Inocencio, Kam Ip, John Irvin, John Irvine, Armen Isaiaants, George Isajiw, Harold Isenberg, Gregory Isenberg, Tetsuo Ishimori, Gary Ishkanian, Rodney Ison, Ricardo Issa, Laxman Iyer, Henry Izurieta, Stephan Izzi, Mark Izzo, Nabil Jabbour, Byron Jackson, John Jackson, Michael R. Jackson, Richard A. Jackson, Robert Jackson, Prema Jacob, Walter Jacobs, Sushil Jain, Ashok Jain, Jaswant Jain, Herbert Jalowsky, Kassamali Jamal, Robert Jansen, Robert Jeanfreau, Ronald Jeffreys, George Jencks III, Paul Jennewine, Albert Johary, Kenneth Johnson, Carol Johnson, David Johnson, Blaine Jones III, Rebecca Jordan, Elaine W. Joslyn, Jeffrey Kagan, Bruce Kahan, Scott Kahney, Amy Kaissar, Stephen Kajencki, Venu Kakarala, Sambamurty Kalahasty, Nedzat Kalici, Luda Kamenetsky, Michael Kamiel, James Kammerling, Ramesh Kania, Ira Kaplan, Marc Kaplan, Richard Kaplan, Khalid Karim, George Karkar, David Karty, Randy Karu, Jerome J. Kastrul, Mulraj N. Katira, John Katsetos, Charles Katzenberger, Steven Katzman, Ronald Kaufman, Bruce Kauk, Morton Kavalier, Tahoor A Kawaja, Susan Kawakami, Mark Kaylin, Marta Kazymyra, Allan Kelly, Richard Kelter, Nancy Kenney, David Kenton, Jayanth Keshavamurthy, Damoder Kesireddy, William Kessler, Clarita Ketels, Nasir Khalidi, Anila Khan, Misal Khan, Muhammad Khan, Waqar Khan, Yervant Khatcherian, Audisho Khoshaba, Rakesh Khosla, Samia Khwaja, Gary Kiefer, Peter Kiefer, Doug Kim, In Kim, Seong Kim, Alan Kimmel, Ganesh Kini, Mark Kipnes, Joseph Kipp, Nicholas T. Kipreos, William Kirby, Robert Kleinhans, Ken Kleinstuber, Martha Klipac, Alexander Klufas, James Knecht, Herman Knoll, Gloria Ko, Howard Koch, Stanley Koch, Peter P. Koenig, Charles Koepke, Keith Koepke, Valeri Koganski, Asha Kohli, Sanjeev Kohli, Gary Kolanchick, Kenneth Kolmeyer, Richard Kondan, Walter Koppel, Walter Koppenbrink, Bonnie Koreff-Wolff, Natalia Kovtun, Denise Kraft, Hal Kramer, Lawrence Kramer, Melvin Kramer, Michael Kramer, Sybil Kramer, Steven Krems, Marc Kress, Barry Kricsfeld, Anath Krishnan, Muthu Krishnan, Robert Kroopnick, Prathibha Kumar, Rakesh Kumar, Satesha Kumar, V. Hema Kumar, Anita Kundra, Michael Kunkel, Anthony Kurian, Richard Kurtz, Scott Kurzrok, Donald Kushner, Muthu Kuttappan, Tim Kval, Peter Kwon, Stella Kwong, Joseph Labuda, Bruce Lachterman, Anthony Lacorte, Jerome Lacy, David Lahasky, Vinodrai Lakhani, Habeeb Lakhani, Aristotel Laliotis, Chad Lamb, Jose Lami, Suman Lamsal, Carl Lang, Alan Langburd, Lorlyne Lange, Anthony Lanier, Rita Laracuenta, Aurorita Lariosa, Joseph Lash, Alan Lau, Marshall Lauer, David Bruce Laughlin, Christopher Lavergne, George Lawrence, Theodore Lawson, Milenko Lazarevic, Kadie Leach, Richard Leavitt, Marc Leblanc, Cristina Lecaros-Trinidad, John Ledbetter, Chok Lee, Daewoo Lee, Joe Lee, John Lee, Karl Lee, Kenneth Lee, Nellie Lee, Tat-Sum Lee, Leonard Lefkovic, Anthony Leone, Eric Lerman, Keith Lerner, Stephen Leshin, Ying-Yan Leung, David Levenson, Phillip Levin, Marc Levine, Brian Levy, Meldon Levy, Richard Levy, Marc Lewen, Randal Lewis, Gary Lewison, Charles Li, Mark Li, Michael Li, Rogelio Li boon, David Lick, Laurence Lief, Cyril Light, Andrew Lim, Dee Beng Lim, Florian R. Limjoco, Shiann Lin, Jeffery Lindenbaum, Edward Linkner, David Liporace, Orrin Lippoff, Jeffrey Lipsky, Robert Lira, Daniel H. Lischwe, Scott Lisse, Jiang Ping Liu, Paul Liu, Hedy Loa, Cherry B. Lobaton, Francisco Lopez-Arostegui, Peter Lopresti, Juliette Loui-Charles, Joseph Lovato, Florentino Loya, Herbert Lubowitz, David Luck, Mark Lueg, Jorge Luengas, Manuel Luni, Jerry Luoma, Lele Luu, Robert L. Lycksell, Lon Lynn, Gregory Lyon-Loftus, Sherry Ma, Shahradd Ma bou rakh, Michael Macadams, James Mackenzie, James Mackrell, Roger Madris, Richard Maffezzoli, James Magee, Robert Mahaffey, Aparna Mahakala, Yugal Maheshwari, Shaban Mahmoud, Gerald Mahon, Francisco Maislos, Prakash Makam, Louis Maletz, Manuel Malicay, Louis Malinow, Stanford Malinow, Steven Malkin, Ashith Mally, Jonathan Maltz, Martin Malz, Joselita Manalac, Richard Mandel, Barbara Mandell, George Manja, Steven Manuli, Raouf F. Maoud, Teresita Maqueda, Padmanabh Maramreddy, Isam Marar, David Margolis, James Margolis, Michael Margolis, Steven Margolis, Eric Marks, Stephen Marsh, Real Martin, Larry Martin, Danny Martin, Deogracias Martinez, Eduardo Martinez, Richard Martinez, Scott Massien, Nosrat Massih, Aziz Masud, Joseph Matheu, John Mathew, Mark Matthias, Elizabeth Mattson, Percy May, Eric Maybach, David A. Mayer, Miguel Mazariegos, Dervilla McCann, David McCarty, Brent McEntire, Patrick McLeroth, Steven McAllen, Edward McCarthy, Thomas E. McCauley, Thomas McClure, Jeremy McConnell, Boyd McCracken, Dee G. McCrary, Chandler McDavid, Camille McDonald, Richard McEwan, John McGee, Ronald McGee, John McGettigan, Kent McGuire, Jerry M. McShane, Neil Meade, Richard Meadows, Andrew Mecca, William Mecca, Almas Mecklai, Edwin Medina, Hansa Medley, Stuart Medoff, Ravi Mehra, Miness Mehta, Jose Meller, Joaquin Menendez, Antonio Menendez, Consuelo Mendez, Alexander Mendez, Mario Mendizabal, Concepcion Mendoza, John Menio, Raj Menon, Gregory Mercurio, John Merillat, Lawrence Merritt, Barry Meyer, Gary Meyers, Rene Meza, Anthony Miccio, Thomas Michelsen, Angelo Miele, Michael Mignoli, Jaroslav Mikus, Thomas Milko, Eugenia Miller, Jason B. Miller, Linus Miller, Michael Miller, Paul Miller, Randall Miller, Steven Miller, Guy Mintz, Milton Mintz, Bhagwan Mirchandani, Suresh Mishra, Sushil Mittal, Shalender Mittal, Jon Miyakawa, Amanda Modesta-Keyhani, Pratibha Modi, Tushar Modi, Rita Mody, Palghat Mohan, Syed Mohsin, Martin D. Mollen, Darren Molter, John Montana, David Montgomery, Dong Moon, Gregory Moore, Jeffrey Moore, Abdul Moosa, Joseph Moran, Sam Morayati, Chadia Morcos, James Moreci, John Moreland, Robert Moretsky, Matthew Morgan, William Morris, Bruce Morrison, James B. Moss III, Robert Moss, Thomas Moss III, J. Phillip Moyer, Kenneth Muckala, Ranajit Mukherjee, Suyra Mundry, Valji Munjapara, John Munshower, Richard Murachanian, John Murashige, Ann Murphy, Ralph Murphy, Kevin Murray, Mustafa Musa, Derek Mused, Boyd Myers, Seymour Myers, Mark Nadaud, Laurie Nahum, Jayaram B. Naidu, Gnanasumathi R. Naini, Jyotirmay Nanda, Iqbal Nasir, Maher M. Nasser, Joseph Nassir, Judith Nations, Hector Navarro, Abdul Nayeem, Kenneth Nelson, Steven Nemirov, Rosa Neno, Frederic Neumann, Thomas Newton, Vuong Nguyen, Brian Nguyen, Khanh Nguyen, Thomas Niebeling, Earl Nielsen, Christopher Normile, Thomas Obarr Jr, Jose Oblena, Bikan Octain, Ola Odugbesan, Patrick Ogilvie, Akin Ogundipe, Timothy O'Keefe, Felix Olash, Robert Ollins, Agata Olszowska, Dennis O'Neill, Yee Ong, Osvaldo Orengo, Lavern Orland, Donald Orth, Ben Oteyza, Baiyin Oung, Jeffrey Packer, Nak Paek, Robert Palandjian, Bryce Palchick, Arthur G. Pacia, Vipul Panchal, Dennis Pangtay, Gary Panik,

Garret Parker, James Parker, David Parker, Keith Parmer, William Paronish, Cyrus Parsey, Surendra Paruchuri, Fred Pastermack, Ajit Patel, Anil Patel, Arun Patel, Chandravadan Patel, Meenakshi Patel, Mohanlal Patel, Nadeem Patel, Piyush Patel, Pravin Patel, Ling Raj Patil, Sridhar Patnam, Henry Patton, Stephen Paulding, John Paulish, Fredrick Payne, Brenda Peabody, Mark Peacock, Gregg Pearson, Anthony Pearson, John Peet, Jose Pelayo, Carmen Perez, Nathan Persoft, Mark Peschiera, Koster Peters, Cornell Peters, Dennis Peterson, William Petit, Charles Pewitt, Tri Minh Pham, Charles W. Phelps, Gregory J. Phillips, Frank Pintauro, Kenneth Pittleman, Gerald A. Pitzl, Lester Ploss, Ethan Podet, David Pogue, Craig Polinsky, Jeff Pollock, Daniel Pomposini, Joseph Pongonis, Vicken Poochikian, Gary Post, Greg Potts, Kevin Pounds, Francis Powers, Amy Prack, Eric Prack, Jan Prasad, David Prelutsky, Larry Present, Jennifer Prescott-Coraggio, John Prosser, Rodolfo Protacio, Joan Prouty-Moore, Bernard Proy, Haresh Punjabi, Priya Punjabi, Alan Purdy, Raman Purighalla, Uma Purighalla, Anthony Purpura, Hoyte Pyle, Kamran Qureshi, Diana Rabadí-Marar, Zenaida E. Racho, Amin Radparvar, Gordon Rafool, Prema Raghu, Chengalro Raghunathan, Suresh Raheja, Adebur Rahman, Nader Rahmanian, Mohammd Rahnama, Marina Raikhel, Paavan Railan, Jon Rainey, Yohana Rajaratnam, Ganesan Rajasekaran, Kumar Ramdas, Pedro Ramirez, Lucila Ramiro, Loaknauth Ramkishun, Richard Randolph, Shashikant Rane, Mallapur Rao, Rafik Raphael, Joshua Rassen, Nita Rastogi, Max Rattes, Frank Rauzi, William Rawlings Jr, Sanjay Ray, Lori Reaves, Salvador Recio, Michael Redding, Nagaratna Reddy, Pankaj Reddy, Ramesh Reddy, Sukanya Reddy, Venkat Reddy, Gregory Reed, Jonathan Reimer, Paul Reinbold, Harvey Resnick, Wayne Reynolds, Bruce Richardson, Rifat Rifat, William Ritchey, Alaida Rivera, Manuel Rivero, Ghyyass Rizk, Michael Rizzo, Mark Robbin, Robert Robbins, Robert Roberts, Barbara Roberts, Kenneth Roberts, Judith Robinson, Rod Robinson, Walter Robison, James Rocco, Robin Rodgers, Humberto Rodriguez, Barry Rodwick, Janelle Roethemeyer, Bernardo Rojas, Claude Romulus, Glen Rosen, Robert Rosen, David Rosenbaum, Steve Rosenbaum, Lauren Rosenberg, Matthew Rosenberg, Paul Rosenblit, Alfred Rosenthal, J. Edward Rosenthal, Benjamin Rosin, Anthony Ross, David Ross, Glenn Ross, Jack Ross, Richard Ross, Jeffrey Royce, Mylene Rucker, Goran Rudic, Edward Rufus, Robert Ruxin, Joseph Rybicki, Oswald Saavedra, Dusan Sabol, Deepti Sadhwani, Harish Sadhwani, Farid Sadr, Bradley Sakran, Kaori Sakurai, Peter Saliba, Ira Salom, Albert Salomon, Renolt Samaan, Thomas Samaras, Jay Sandberg, Jaime Sandoval, Anita Sanharival, Donato Santangelo III, Kesari Sarikonda, Chitto Sarkar, Louis Sasser, Robert Savory, Suman Sawhney, Mark Sawka, Paul Sawrey, Rajesh Saxena, Varun Saxena, Carlos C. Say, Ronald Schachere, Kenneth E. Schafermeyer, John F. Scheerer, Kevin Schendel, Richard Schuermann, Brent Schlapper, Jay Schmidt, Christian J. Schmitt, John Schoenberger, Charles Schuhmacher, Jeffrey Schultz, Verne Schwager, Daniel Schwartz, David Schwartz, Julio Schwartzman, Neil Schwartzman, David Schweizer, Mark Scialabba, Peter Scivoletti, Herbert Secouler, Edward Secunda, Melvin Seek, Elizabeth Seet, Andrew Segal, Georgina Shehpayak, Barry Seidman, Munni Selagumsetty, Howard Selinger, Marc Seltan, Pollachi Selvakumarraj, Usha Seth, Mohammd Sethi, Carlos Seuc, Zachary Gregg Seymour, Arthur Sgalilia, Dhiren Shah, Gaurang Shah, Mahesh Shah, Shrenik Shah, Vinod Shah, Mohammd Shaikh, Farihorz Shams, Martin Shansky, David Shapiro, Elton Shapiro, Rajendra Sharma, Susan Sharma, C. Richard Sharpe, Burton Shaw, George Shaw, Michael Shaw, Michael Sheaffer, Leon Sheer, Marc Shepard, Neil Shepler, Stephen Sherer, Yogesh Sheth, Stephen Shiffman, Mikhail Shik, Jocelyn Shimek, Edwin Shoaf, Matthew Shore, David Shore, Rosalind Shorestein, Michael Shorestein, Phillip Shou, Alla Shpaner, Dhana Shrestha, Krishanav Shroff, Alok Shukla, Stephen Siegel, Mark Siegelheim, Augusto Silva, Michael Silverman, William Silverman, Calvin Simmons, Robert J. Simon, Stephan Simons, Lawrence Sinatra, Gurcharan Sing, H. Paul Sing, Lakheram Singh, Sarupinder Singh, Vineet Singla, Prabhat Sinha, Hicham Siouty, Kanagarat Sivalingam, Walter Skowsky, Stan Slabic, Alex Slandzicki, Juris Slesers, Lance Sloan, Steven Smallow, Albert Smith, Gary Scott Smith, George Smith, Howard Smith, Jack Smith, James Smith, Janet Smith, Kenneth Smith, Muhammad Smith, Ruth Smothers, Bruce Sobel, Celeste Soberano, Todd Sobol, Barbara Socha, Carl Sofley, Nalin Soni, Om P. Sood, William Soper, Rodolfo Sotolongo, Sun-Chung Soung, Paris Spanolios, Angelo Sparagna III, Lisa Speck, Gary Spector, Robert Spees, Paul Spilseth, David Spingarn, Wanda Spunter, Karen Squire, Jagwinder Sraow, Indra Sriram, Eileen Stade, Steven Staehling, Douglas Stafford, Richard Staller, Sheldon Staller, Jeffrey Stalaker, Ian Stamp, Michael Stark, Samuel Steele, George Stefanos, Paul Stein, Gregory Stevens, Jewel Stevens, H. Edwin Stickle, Donald Stillwagon, Randall Stoltz, Grace Stonerock, Mark Storey, Helen Story, Michelle Stram, Robert Straub, Dan Streja, Clement Strumillo, Robert Strzinek, Richard Stuntz, David Subich, Marivic Sumulong-Tomacruz, David Sundheimer, David P. Suresh, John Surso, Michael Suter, Joanna Swauger, Todd Swick, William Swofford, Martin Szanto, Henry Szelag, J. Simon Szeto, Alan Tannenbaum, J. Ross Tanner, Steven Tatar, Titus Taube, Robert Taxin, Dawn Taylor, Jack Taylor, Joseph Taylor, Leroy Taylor, Miriam Tedder, Albert Q. Tejada, Romulo Tengco, Stephen Tepastte, Wanda Terrell, Ryan Thai, Kriangsak Thepveera, Carl Thomas, Francis Thomas, Jon Thomas, Linda Thomas, Roger Thompson, Robert Thomson, Donald Tice, Gary A. Tigges, An Ngoc To, Alexander Ton, Scott Tong, Angelita Topacio, Elizabeth Torres, Jose Torres, Lawrence Tran, Thuy Tran, Miguel Trevino, Stacy Trinkle, Joseph Trollman, Stella Tsai, Michael Tsun, Cheng-Yang Christian Tu an, Charles Tuen, Charles Tuffli, Emmanuel Turkson, Gildardo Turullols, Julio Ugarte, Philomena Ukwade, Guy Ulrich, Hollis Underwood, Ronald Underwood, Enrique Urdanivia, Joji Urlanda, Mark Vacker, Richard Vail, Jorge Vallecillo, George van Weelden, John Vandam, John Vanderzyl, Laverne Vandewall, Bruce Vanvraken, Ronald Vargo, Chandrasekhar Varma, Ronald Varns, Dipak Vashi, Sergio Vega, George Venhuizen, Srividya Venkataraman, Devinder Verma, Kewal Verma, Raman Verma, Yash Verma, Samuel Verzosa, James Vevaina, Alberto Villa, Anicia Villafria, Ramon Villafria, Thomas Vinton, John Vo, Priti Vyas, Robert Vyge, Dan Waddell, Thomas Wade, Willis Wagner, San San Wai, Subhash Waikar, John Walker, Mark Wallace, Leslie Walter, Barry Walters, Jean Wang, Pang Wang, Paul Wang, Darius Wania, Pamela Wansker, Sam Ward, David Ware, Teresa Wargovich, Caleb Warren, Jeffery Warren, Wilbert Warren, Malika Waseem, Luther Weathers, Howard Weaver, Barry Webb, William Webb, Ronald Weddle, Gerald Weingarten, Morton Weinstein, Frances Weinstock, Robert Weinstock, Albert Weisbrot, Robert Weiss, Lawrence Weissman, Michele Welling, Murray Wellner, Andrew Wells, Jean Welsh, William D. Welsh, Alvin Wenneker, Charles Wessel, Robert Wheeler, George Whiddon, Ernest White, Matthew White, Ruth White, Todd Wien, Alan Wiggers, Charles E. Wilkins, Kent Willadsen, John Willard, Barbara Williams, Barry J. Williams, Christopher Williams, Harold Williams, Kenneth Williams, Ian Wilson, Joseph Winik, R. Dennis Winkel, Arnold Winokur, Mark Winters, Michael Witt, Yu Wong, Robert Wood, William Woodberry, Marla Wool, Richard Woronoff, James Wortman, Deborah Wozniak, William S. Wu, Donald Yakel, Marcos Yang, John Yaros, Sanjay Yathiraj, Walter Yee, Ian Yip, Henry Yu, Z. Jian Yu, Tina Yuan, Clifford Yut, Christine Zador-Silverman, Maurice Zaghera, Syed Zaidi, Richard Zajac, Laura Zalberg, Ratna Zampani, Michelle Zaniewski, Jack Zaremba, Andrew Zazaian, John Zazaian, Clark Zeddies, Michael Zeitlin, John Zias, Ronald Ziman, Argiro Zofakis, Robert Zolten, Antonio Zumpano, Karl Zuzarte.
